# Supplementary material for: Glycosylation of Quercetin by Selected Entomopathogenic Filamentous Fungi and Prediction of Its Products’ Bioactivity
Source: MDPI journal article supplement (doi:10.3390/ijms241411857), 2023-07-24
Supplement: s1 [file s1]

# Supplementary Data

## Glycosylation of quercetin by selected entomopathogenic filamentous fungi and prediction of its products' bioactivity

Tomasz Tronina<sup>1\*</sup>, Mateusz Łużny<sup>1</sup>, Monika Dymarska<sup>1</sup>, Monika Urbaniak<sup>2</sup>, Ewa Kozłowska<sup>1</sup>, Michał Piegza<sup>3</sup>, Łukasz Stępień<sup>2</sup> and Tomasz Janeczko<sup>1\*</sup>

<sup>1</sup> Department of Food Chemistry and Biocatalysis, Wrocław University of Environmental and Life Sciences, Norwida 25, 50-375 Wrocław, Poland; mat.luzny@gmail.com (M.Ł.); monika.dymarska@gmail.com (M.D.); e.a.kozłowska@gmail.com (E.K.)

<sup>2</sup> Department of Pathogen Genetics and Plant Resistance, Institute of Plant Genetics, Polish Academy of Sciences, Strzeszyńska 34, 60-479 Poznań, Poland; murb@igr.poznan.pl (MU); lste@igr.poznan.pl (ŁS)

<sup>3</sup> Department of Biotechnology and Food Microbiology, Wrocław University of Environmental and Life Sciences, Chełmońskiego 37, 51-630 Wrocław, Poland; michal.piegza@upwr.edu.pl (MP)

\* Correspondence: tomasz.tronina@upwr.edu.pl (T.T.); janeczko13@interia.pl (T.J.); Tel.: +48-713-205-195

### Content

**Table S1.** Identification of fungal strains on the basis of the sequence of the ITS1-ITS2 sequences and comparison with reference ITS sequences.

**Figure S1.** Structure of quercetin (1)

**Figure S2.** UV spectra of quercetin (1)

**Supplementary Data 1.** NMR Spectral data of quercetin (1)

**Figure S3.** <sup>1</sup>H NMR spectra of quercetin (1) (600MHz, DMSO-*d*<sub>6</sub>)

**Figure S4.** <sup>13</sup>C NMR spectra of quercetin (1) (151 MHz, DMSO-*d*<sub>6</sub>)

**Figure S5.** Structure of 7-*O*-β-D-(4''-*O*-methylglucopyranosyl)-quercetin (2)

**Figure S6.** UV spectra of 7-*O*-β-D-(4''-*O*-methylglucopyranosyl)-quercetin (2)

**Supplementary Data 2.** NMR Spectral data of 7-*O*-β-D-(4''-*O*-methylglucopyranosyl)-quercetin (2)

**Figure S7.** <sup>1</sup>H NMR spectra of 7-*O*-β-D-(4''-*O*-methylglucopyranosyl)-quercetin (2) (600MHz, DMSO-*d*<sub>6</sub>)

**Figure S8.** <sup>13</sup>C NMR spectra of 7-*O*-β-D-(4''-*O*-methylglucopyranosyl)-quercetin (2) (151 MHz, DMSO-*d*<sub>6</sub>)

**Figure S9.** <sup>1</sup>H -<sup>1</sup>H NMR (COSY) spectrum of quercetin 7-*O*-β-D-(4''-*O*-methyl)glucopyranoside (2) (600 /600 MHz, DMSO-*d*<sub>6</sub>)

**Figure S10.** <sup>1</sup>H -<sup>13</sup>C NMR (HSQC) spectrum of quercetin 7-*O*-β-D-(4''-*O*-methyl)glucopyranoside (2) (600 /151 MHz, DMSO-*d*<sub>6</sub>)

**Figure S11.** Structure of 3-*O*-β-D-(4''-*O*-methylglucopyranosyl)-quercetin (3)

**Figure S12.** UV spectra of 3-*O*-β-D-(4''-*O*-methylglucopyranosyl)-quercetin (3)

**Supplementary Data 3.** NMR Spectral data of 3-*O*-β-D-(4''-*O*-methylglucopyranosyl)-quercetin (3)

**Figure S13.**  $^1\text{H}$  NMR spectra of 3-O- $\beta$ -D-(4''-O-methylglucopyranosyl)-quercetin (**3**) (600MHz, Acetone- $d_6$ )

**Figure S14.**  $^{13}\text{C}$  NMR spectra of 3-O- $\beta$ -D-(4''-O-methylglucopyranosyl)-quercetin (**3**) (151 MHz, Acetone- $d_6$ )

**Figure S15.**  $^1\text{H}$  - $^1\text{H}$  NMR (COSY) spectrum of quercetin 3-O- $\beta$ -D-(4''-O-methylglucopyranosyl)-quercetin (**3**) (600/600 MHz, Acetone- $d_6$ )

**Figure S16.**  $^1\text{H}$  - $^{13}\text{C}$  NMR (HSQC) spectrum of quercetin 3-O- $\beta$ -D-(4''-O-methylglucopyranosyl)-quercetin (**3**) (600 /151 MHz, Acetone- $d_6$ )

**Figure S17.** Structure of 3-O- $\beta$ -D-(glucopyranosyl)-quercetin (**4**)

**Figure S18.** UV spectra of 3-O- $\beta$ -D-(glucopyranosyl)-quercetin (**4**)

**Supplementary Data 4.** NMR Spectral data of 3-O- $\beta$ -D-(glucopyranosyl)-quercetin (**4**)

**Figure S19.**  $^1\text{H}$  NMR spectra of 3-O- $\beta$ -D-(glucopyranosyl)-quercetin (**4**) (600MHz, Acetone- $d_6$ )

**Figure S20.**  $^{13}\text{C}$  NMR spectra of 3-O- $\beta$ -D-(glucopyranosyl)-quercetin (**4**) (151 MHz, Acetone- $d_6$ )

**Figure S21.**  $^1\text{H}$  - $^1\text{H}$  NMR (COSY) spectrum of quercetin 3-O- $\beta$ -D-(glucopyranosyl)-quercetin (**4**) (600/600 MHz, Acetone- $d_6$ )

**Figure S22.**  $^1\text{H}$  - $^{13}\text{C}$  NMR (HSQC) spectrum of quercetin 3-O- $\beta$ -D-(glucopyranosyl)-quercetin (**4**) (600/151 MHz, Acetone- $d_6$ )

**Figure S23.** Selected chromatograms showing progress of quercetin (**1**) biotransformation in the cultures of entomopathogenic filamentous fungi.

**Table S2a.** Microbial transformation of quercetin, HPLC conversion expressed by means and standard deviation.

**Table S2b.** Microbial transformation of quercetin, HPLC conversion expressed by means and standard deviation (continuation).

**Figure S24.** Progress in production of compound **2** by entomopathogenic fungi.

**Figure S25.** Progress in production of compound **3** by entomopathogenic fungi.

**Figure S26.** Progress in production of compound **4** by entomopathogenic fungi.

**Table S1.** Identification of fungal strains on the basis of the sequence of the ITS1-ITS2 sequences and comparison with reference ITS sequences.

| Name of fungal strain | Identified fungal species      | Sequence identity                                                                                          | Sequence                                                                                                                                                                                                                                                                                                                                                                                                                                                                                                                                 |
|-----------------------|--------------------------------|------------------------------------------------------------------------------------------------------------|------------------------------------------------------------------------------------------------------------------------------------------------------------------------------------------------------------------------------------------------------------------------------------------------------------------------------------------------------------------------------------------------------------------------------------------------------------------------------------------------------------------------------------------|
| CYS17                 | <i>Metapochonia bulbillosa</i> | 99% identity to <i>Metapochonia bulbillosa</i> , Acc. Numbers: OK661050.1, DQ132810.1, MK164206.1          | GGTCACTCTAAAAAGTTGGGCGTTTTACGGCAGTGGCCGCGTCGCGCTCccgctgagGTTGTGCTACTACGCAGAGGAGGCCGACGgggcccCAATTCATTTGCGGGGCGGCGGACGCGCCGGGGGTGTTCCCCCGGCGAGGTCGCGGTCCCCAACACCAGGCCACTGGGGCTTGAGGGTTGAAATGACGCTCGAACAGGCATGCCCCCAGAATACTGGCGGGCGCAATGTGCGTTCAAAGATTGATGATTCACTGAATTCTGCAATTCACATTACTATCGCATTTGCTGCGTTCTTCATCGATGCCAGAACCAAGAGATCCGTTGTTGAAAGTTTTGATTCATTTGTTTATGATTCCACTCAGACATGCTATAAAAAAGATACAAGAGTTTTGGTCCCCCGCGGGCGCCTGGTTCCGGCGGCCCTCGGGCGCTTCCGGGGCGTTaACCCGCCGAAGCAACAGTAAAGGTATAAGTTCACAGGGGTTTGGGAGTAGAATAACTCGTAATGATCCCTCCGC |
| CYS30                 | <i>Isaria tenuipes</i>         | 100% identity to <i>Isaria tenuipes</i> , Acc. Numbers: MT966070.1, MT966058.1, MT966055.1                 | GTCACGTTTCAGAGGTTGGGGGTTTCACGGCGGGCCGCGTCGGGTTCCcgGtgcaGTGCTTGTACTGCGCAGAGGTCGCCGCGGACGGGCCgCCA CTCCATTTTCAGGGCCGGCGGGGTGCTGCCGGTCCCCAAGGCCGACGTCCCGGGGACGTCGAGGGTTGAAATGACGCTCGAACAGGCATGCCCGCCAGAATGCTGGCGGGCGCAATGTGCGTTCAAAGATTGATGATTCACGGAATTCTGCAATTCACATTACGTATCGCATTTGCTGCGTTCTCATCGATGCCAGAACCAAGAGATCCGTTGTTGAAAGTTTTGATTCTTTGTGTTGCCTTGCGGCGGATTACAGAGAGGCTGACAGATACAGGGTTGCGTGTTCCCGGGCGGCCGCTGGGTCCAGGTGCGGGGCCGGCGCTGGGCCGTCCGGACGCTGGGGCGGGTCCGCCGAAGCAACTATGGTAGGTTTCACAGAAGGGTTGGGAGTTGTAAACTCTGGTAATGATCCCTCCG        |
| MU35                  | <i>Isaria tenuipes</i>         | 100% identity to <i>Isaria tenuipes</i> , Acc. Numbers: MT966070.1, MT966058.1, MT966055.1                 | GTCACGTTTCAGAGGTTGGGGGTTTCACGGCGGGCCGCGTCGGGTTCCcggtgcgaGTGCTTGTACTGCGCAGAGGTCGCCGCGGACGGGCCGCCA CTCCATTTTCAGGGCCGGCGGGGTGCTGCCGGTCCCCAAGGCCGACGTCCCGGGGACGTCGAGGGTTGAAATGACGCTCGAACAGGCATGCCCGCCAGAATGCTGGCGGGCGCAATGTGCGTTCAAAGATTGATGATTCACGGAATTCTGCAATTCACATTACGTATCGCATTTGCTGCGTTCTCATCGATGCCAGAACCAAGAGATCCGTTGTTGAAAGTTTTGATTCTTTGTGTTGCCTTGCGGCGGATTACAGAGAGGCTGACAGATACAGGGTTGCGTGTTCCCGGGCGGCCGCTGGGTCCAGGTGCGGGGCCGGCGCTGGGCCGTCCGGACGCTGGGGCGGGTCCGCCGAAGCAACTATGGTAGGTTTCACAGAAGGGTTGGGAGTTGTAAACTCTGGTAATGATCCCTCCGAG     |
| MU4                   | <i>Metarhizium anisopliae</i>  | 100% identity to <i>Metarhizium anisopliae</i> , Acc. Numbers: FJ177507.1, and 99%: FJ177475.1, EU307928.1 | GTCATAAAAAaGTTGGGGGGTTTTACGGCAGTGgacCGCGCCGGGCTCctgttGCGaGTGTTTTACTACTGCGCAGAGGAGGGCCACGGCgagACCGCAATTGATTTGAGGGACGGTGCGCTGGAAAACAGCCTCGCCGATCCCCAACACCAAGTCCACAGGGGACTTGAGGGGCGTAATGACGCTCGAACAGGCATGCCCCCAGAATACTGACGGGCGCAATGTGCGTTCAAAGATTGATGATTCACTGAATTCTGCAATTCACATTACTTATCGCATTTGCTGCGTTCTTCATCGATGCCAGAACCAAGAGATCCGTTGTTGAAAGTTTTGATTCATTTTTTTAACCCTCAGAAGATACTTATAAAAAATTCAGAAGGTTTGGGTCCCCGGCGGGCGCGAAGTCCCGCCGAAGCAACAATTAAGGTATAATTCACAGGGGTTGGGAGtTGATAA CTCGGTAATGATCCCTCCGCA                                           |

**Figure S1.** Structure of quercetin (**1**)

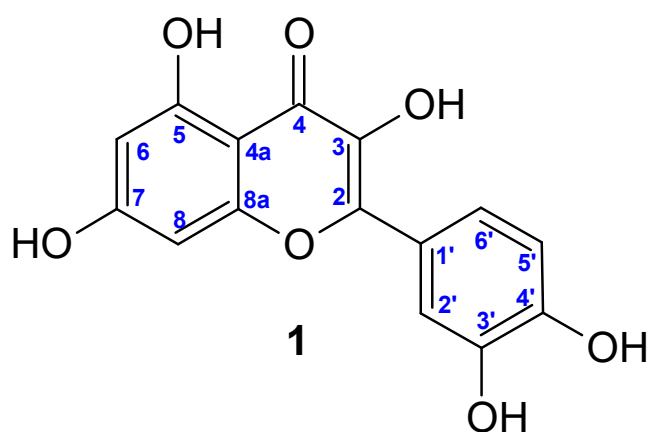

**Figure S2.** UV spectra of quercetin (**1**)

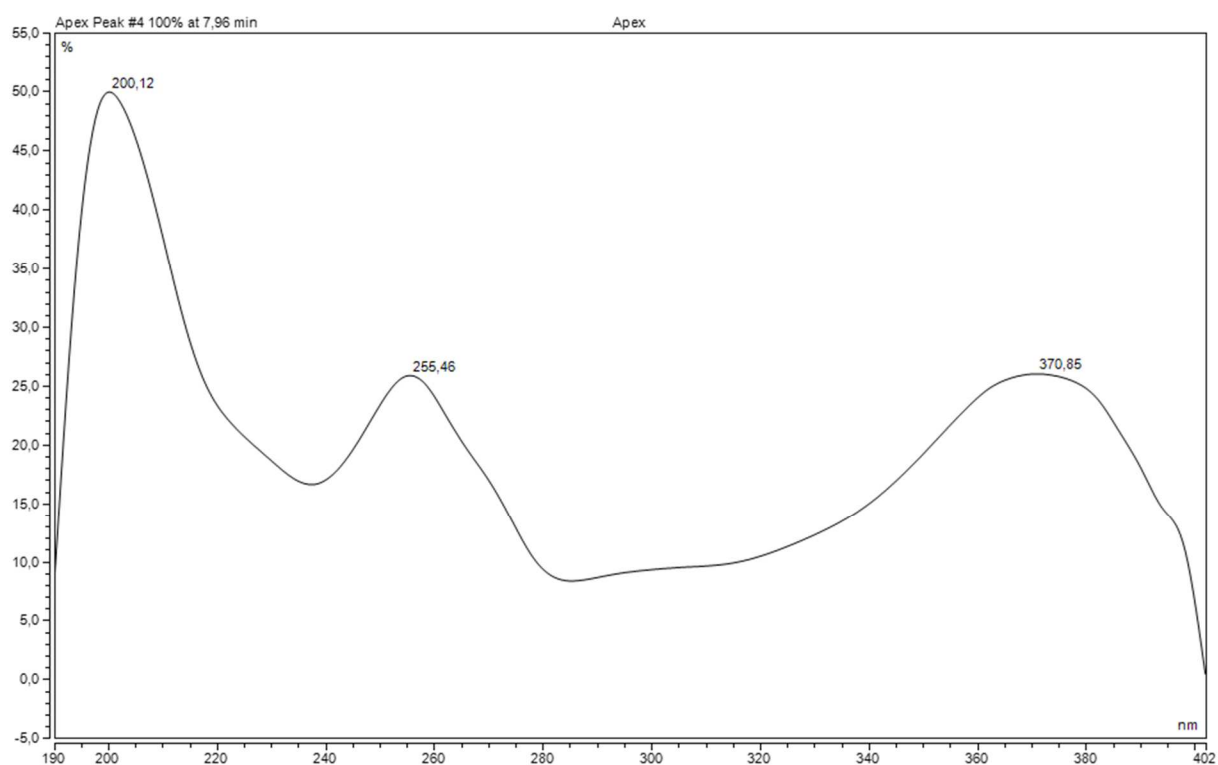

**Supplementary Data 1.** NMR Spectral data of quercetin (**1**):  $^1\text{H-NMR}$  ( $\text{DMSO-}d_6$ )  $\delta_{\text{H}}$ : 6.19 (1H, d,  $J = 2.1$  Hz, H-6), 6.41 (1H, d,  $J = 2.1$  Hz, H-8), 6.89 (1H, d,  $J = 8.5$  Hz, H-5'), 7.54 (1H, dd,  $J = 8.5, 2.2$  Hz, H-6'), 7.68 (1H, d,  $J = 2.2$  Hz, H-2').  $^{13}\text{C-NMR}$  ( $\text{DMSO-}d_6$ )  $\delta_{\text{C}}$ : 93.2 (C-8), 98.0 (C-6), 102.9 (C-10), 114.9 (C-2'), 115.4 (C-5'), 119.8 (C-6'), 121.8 (C-1'), 135.6 (C-3), 144.9 (C-3'), 146.6 (C-2), 147.5 (C-4'), 156.0 (C-9), 160.6 (C-5), 163.7 (C-7), 175.7 (C-4).

**Figure S3.**  $^1\text{H}$  NMR spectra of quercetin (**1**) (600MHz,  $\text{DMSO-}d_6$ )

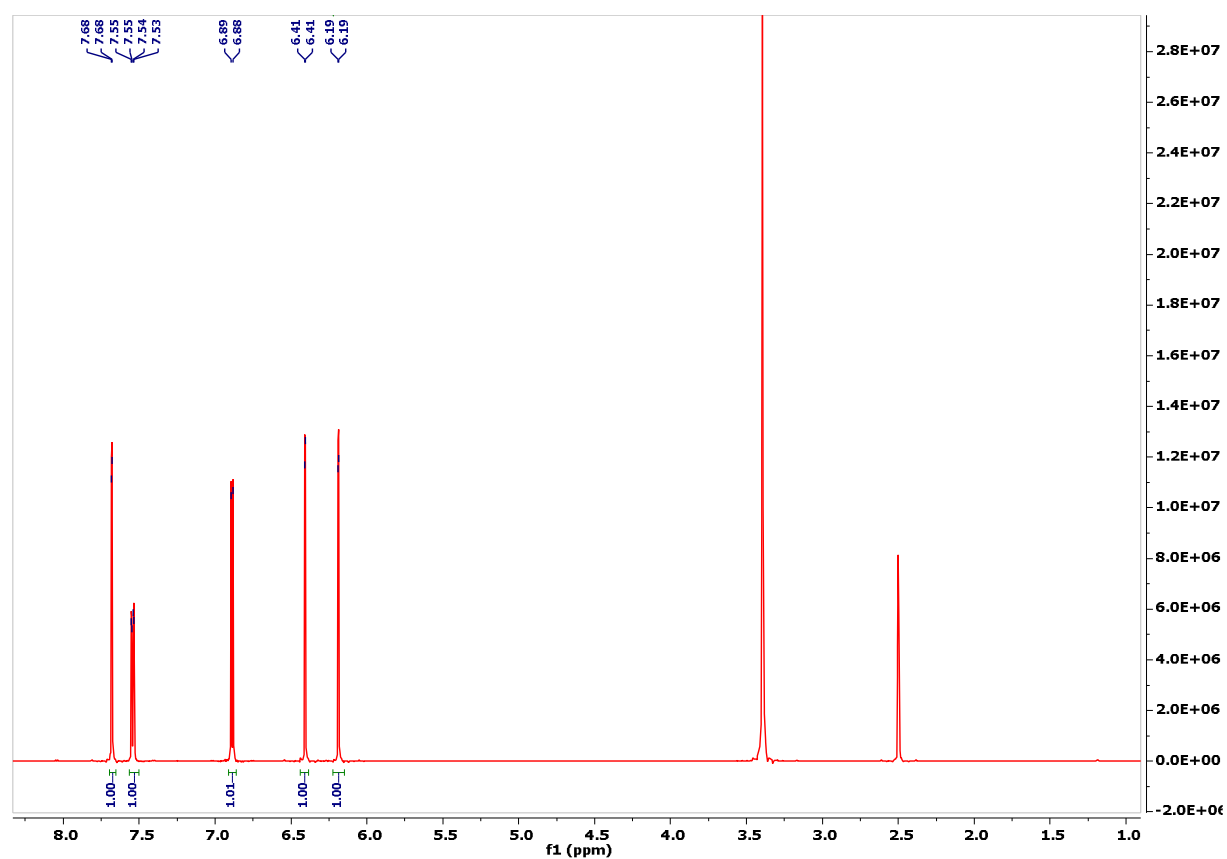

**Figure S4.**  $^{13}\text{C}$  NMR spectra of quercetin (**1**) (151 MHz,  $\text{DMSO-}d_6$ )

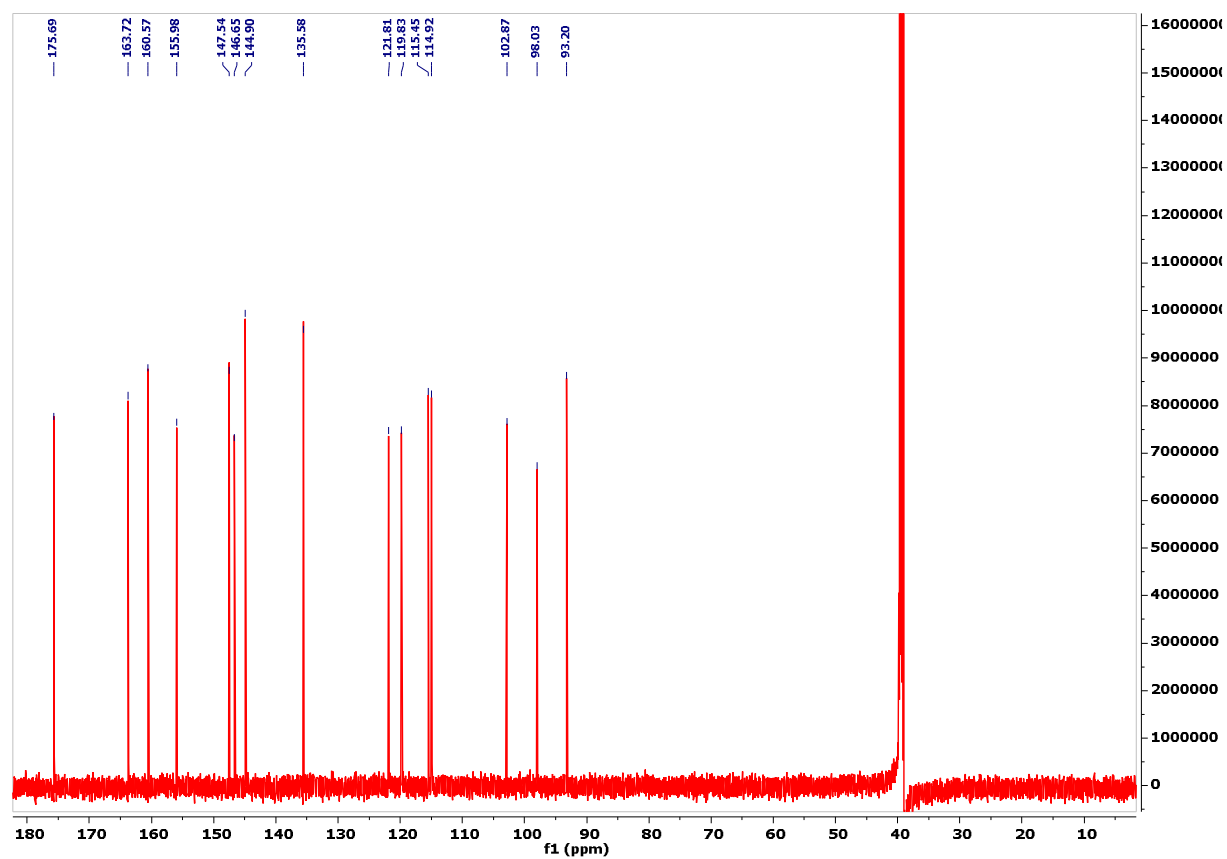

**Figure S5.** Structure of 7-*O*- $\beta$ -D-(4''-*O*-methylglucopyranosyl)-quercetin (**2**)

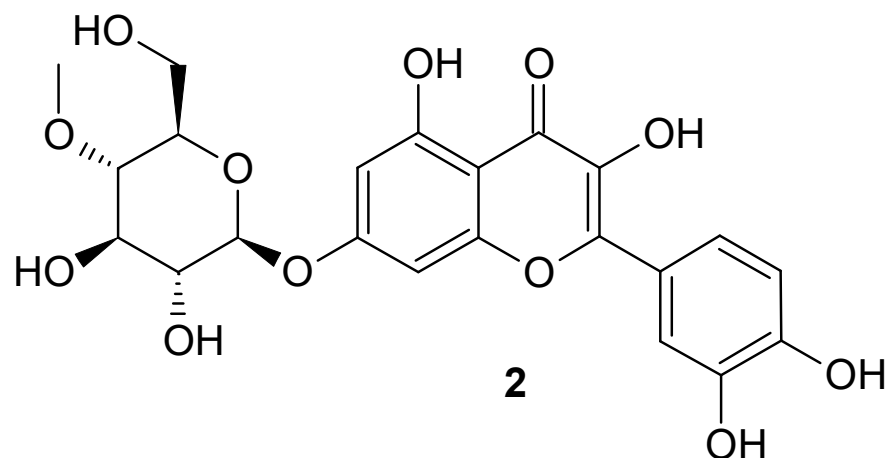

**Figure S6.** UV spectra of 7-*O*- $\beta$ -D-(4''-*O*-methylglucopyranosyl)-quercetin (**2**)

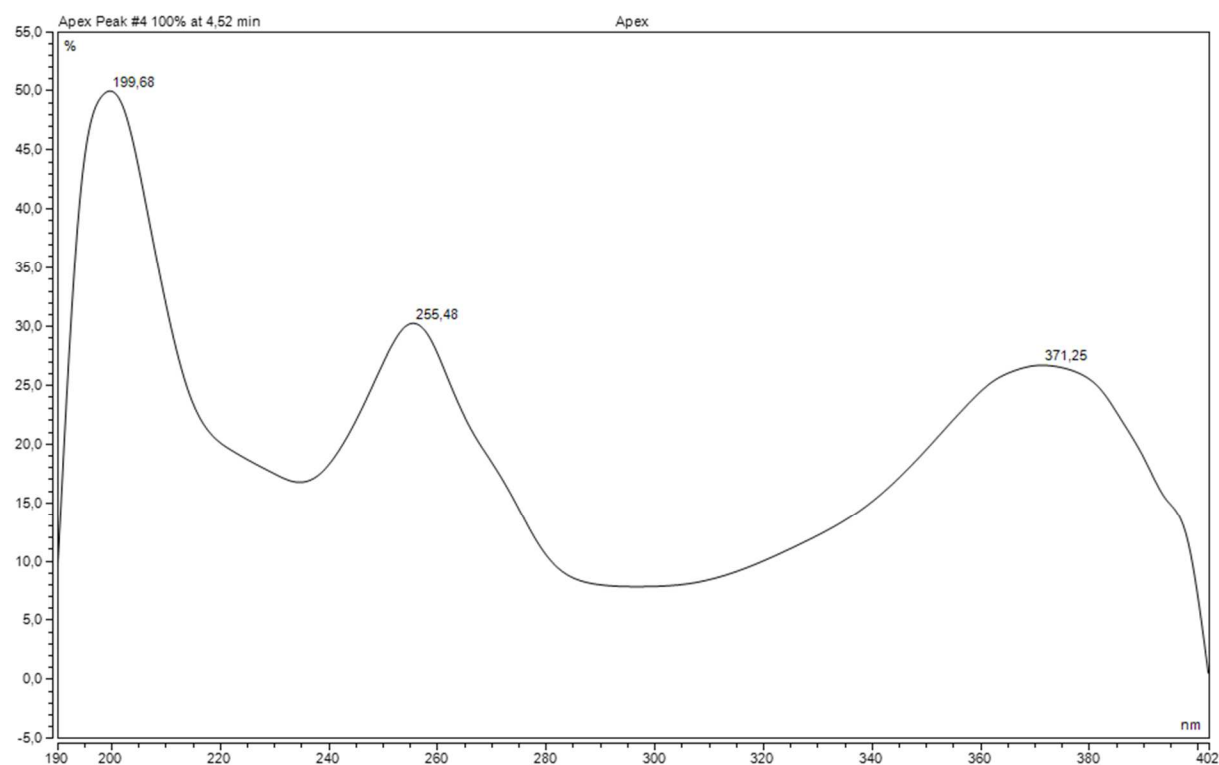

**Supplementary Data 2.** NMR Spectral data of 7-*O*- $\beta$ -D-(4''-*O*-methylglucopyranosyl)-quercetin (**2**):  $^1\text{H}$ -NMR ( $\text{DMSO-}d_6$ )  $\delta\text{H}$ : 3.05 (1H, t,  $J = 9.0$  Hz, H-4''), 3.26 (1H, dd,  $J = 9.0, 7.8$  Hz, H-2''), 3.44 (1H, t,  $J = 9.0$  Hz, H-3''), 3.46 (3H, s, C4''-OCH<sub>3</sub>), 3.49–3.53 (1H, m, C-5'' overlapped on H-6'' a), 3.49–3.53 (1H, m, H-1'' a, overlapped on H-5''), 3.62–3.68 (1H, m, H-6'' b), 5.10 (1H, d,  $J = 7.8$  Hz, H-1''), 6.42 (1H, d,  $J = 2.2$  Hz, H-6), 6.76 (1H, d,  $J = 2.2$  Hz, H-8), 6.90 (1H, d,  $J = 8.5$  Hz, H-5'), 7.55 (1H, dd,  $J = 8.5, 2.2$  Hz, H-6'), 7.72 (1H, d,  $J = 2.2$  Hz, H-2').  $^{13}\text{C}$ -NMR ( $\text{DMSO-}d_6$ )  $\delta\text{C}$ : 59.7 (C-4''-OCH<sub>3</sub>), 60.1 (C-6''), 73.2 (C-2''), 75.6 (C-5''), 76.0 (C-3''), 78.8 (C-4'), 94.2 (C-8), 98.6 (C-6), 99.5 (C-1''), 104.6 (C-4a), 115.3 (C-2'), 115.5 (C-5'), 120.0 (C-6'), 121.8 (C-1'), 136.0 (C-3), 145.0 (C-3'), 147.5 (C-2), 147.8 (C-4'), 155.7 (C-8a), 160.1 (C-5), 162.6 (C-7), 175.9 (C-4).

**Figure S7.**  $^1\text{H}$  NMR spectra of 7-O- $\beta$ -D-(4''-O-methylglucopyranosyl)-quercetin (**2**) (600MHz,  $\text{DMSO-}d_6$ )

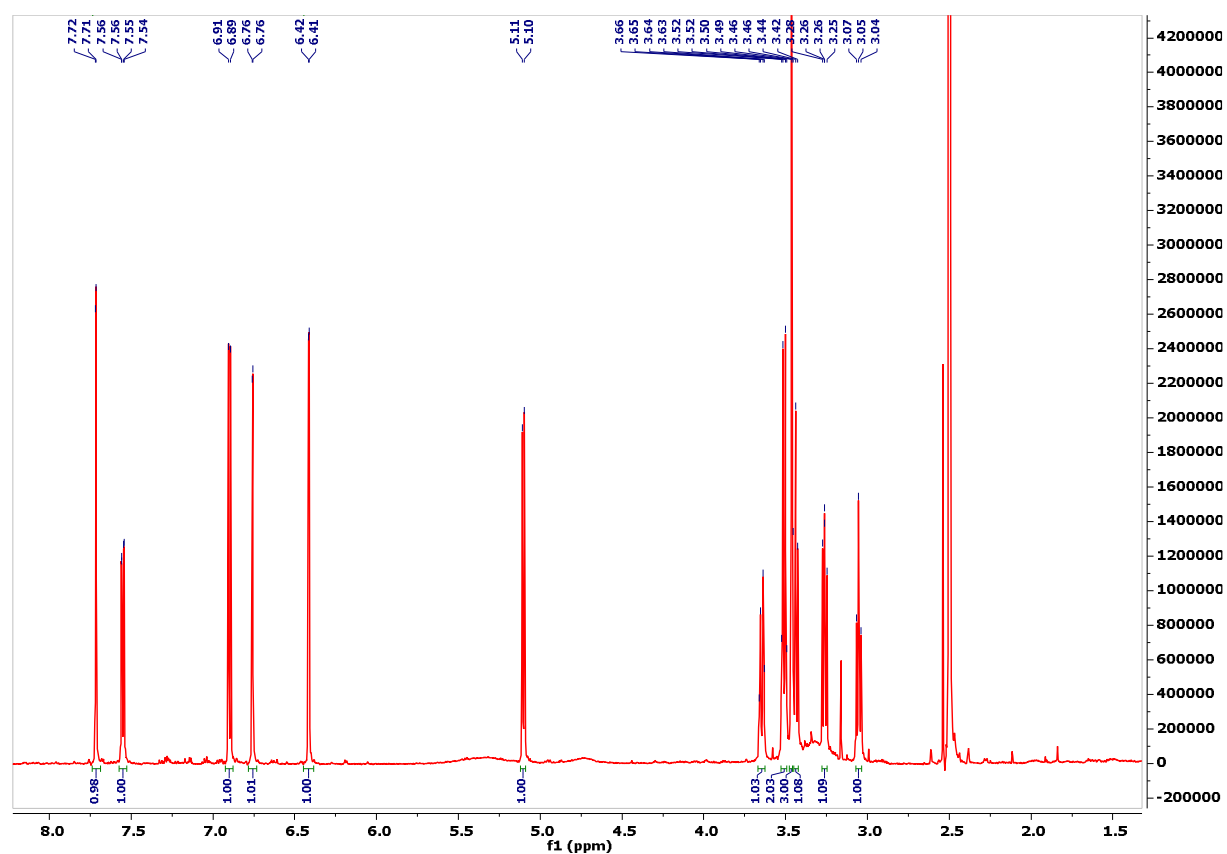

**Figure S8.**  $^{13}\text{C}$  NMR spectra of 7-O- $\beta$ -D-(4''-O-methylglucopyranosyl)-quercetin (**2**) (151 MHz,  $\text{DMSO-}d_6$ )

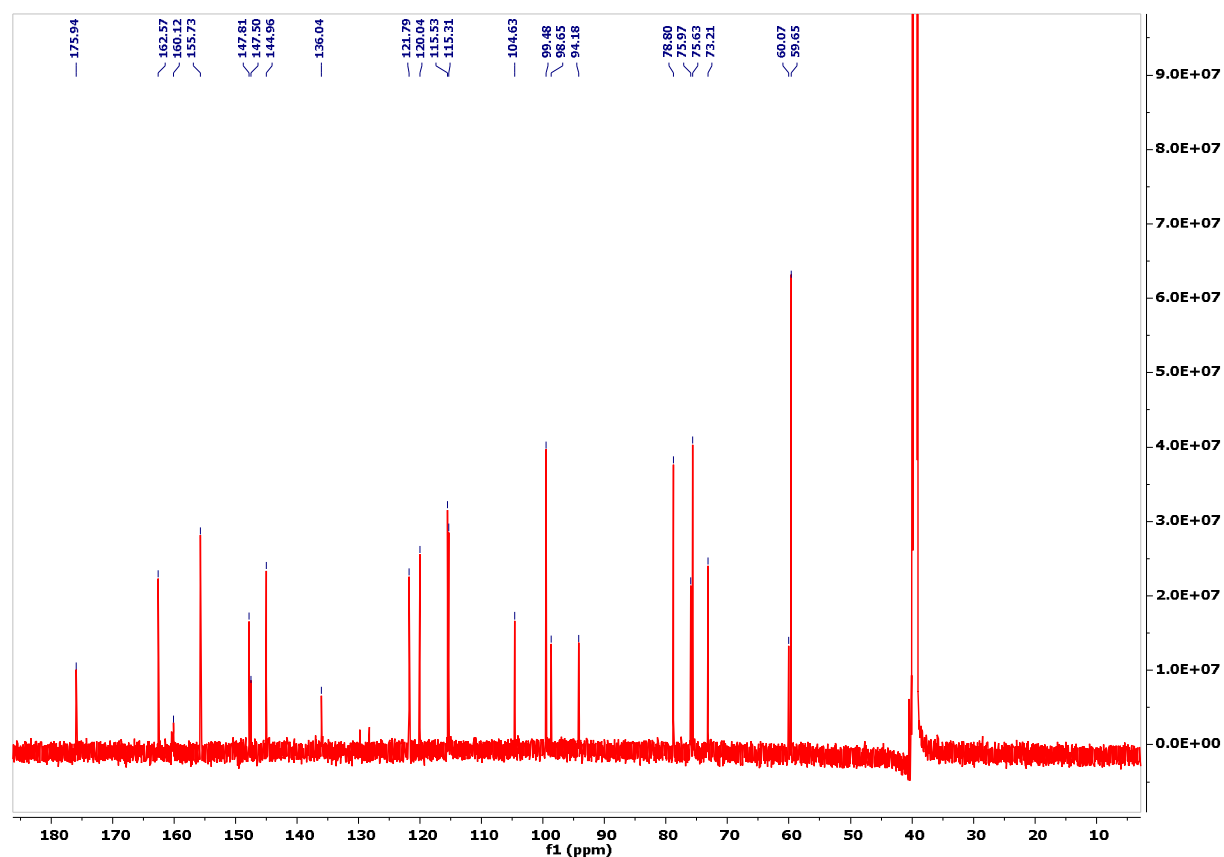

**Figure S9.**  $^1\text{H}$  -  $^1\text{H}$  NMR (COSY) spectrum of quercetin 7-*O*- $\beta$ -D-(4''-*O*-methyl)glucopyranoside (**2**) (600 /600 MHz,  $\text{DMSO-}d_6$ )

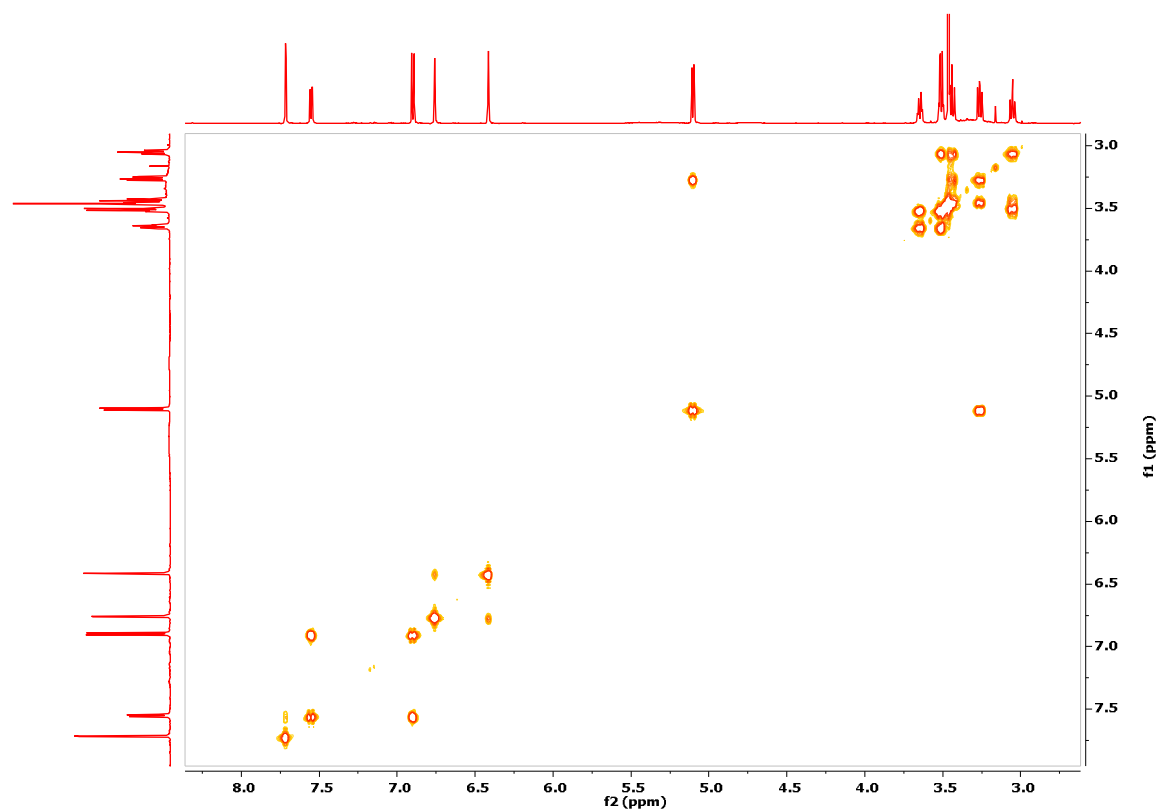

**Figure S10.**  $^1\text{H}$  -  $^{13}\text{C}$  NMR (HSQC) spectrum of quercetin 7-*O*- $\beta$ -D-(4''-*O*-methyl)glucopyranoside (**2**) (600 /151 MHz,  $\text{DMSO-}d_6$ )

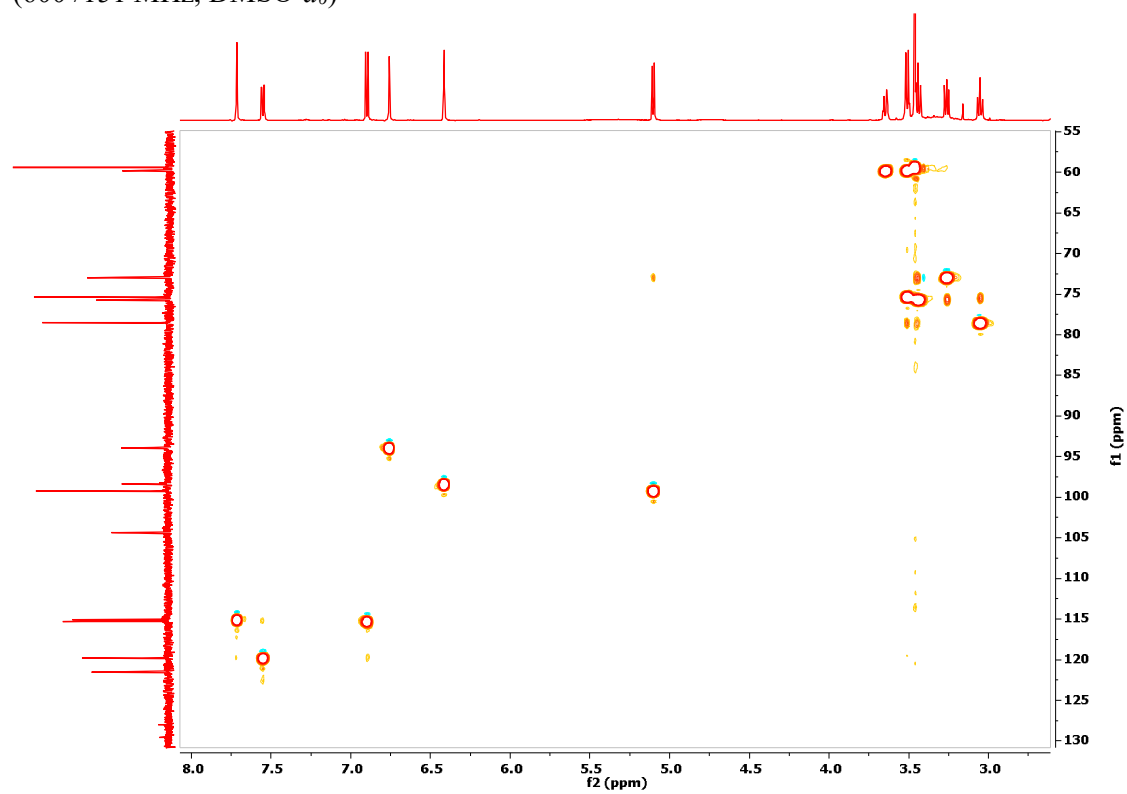



**Figure S11.** Structure of 3-*O*- $\beta$ -D-(4''-*O*-methylglucopyranosyl)-quercetin (**3**)

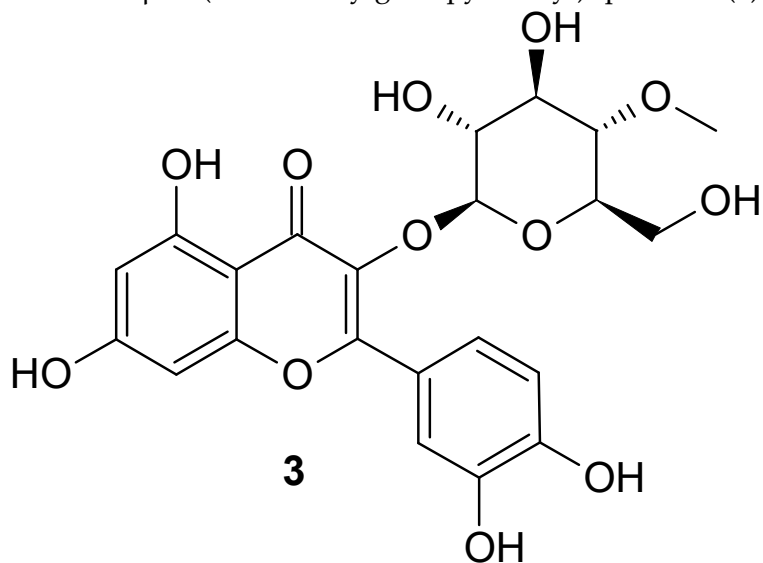

**Figure S12.** UV spectra of 3-*O*- $\beta$ -D-(4''-*O*-methylglucopyranosyl)-quercetin (**3**)

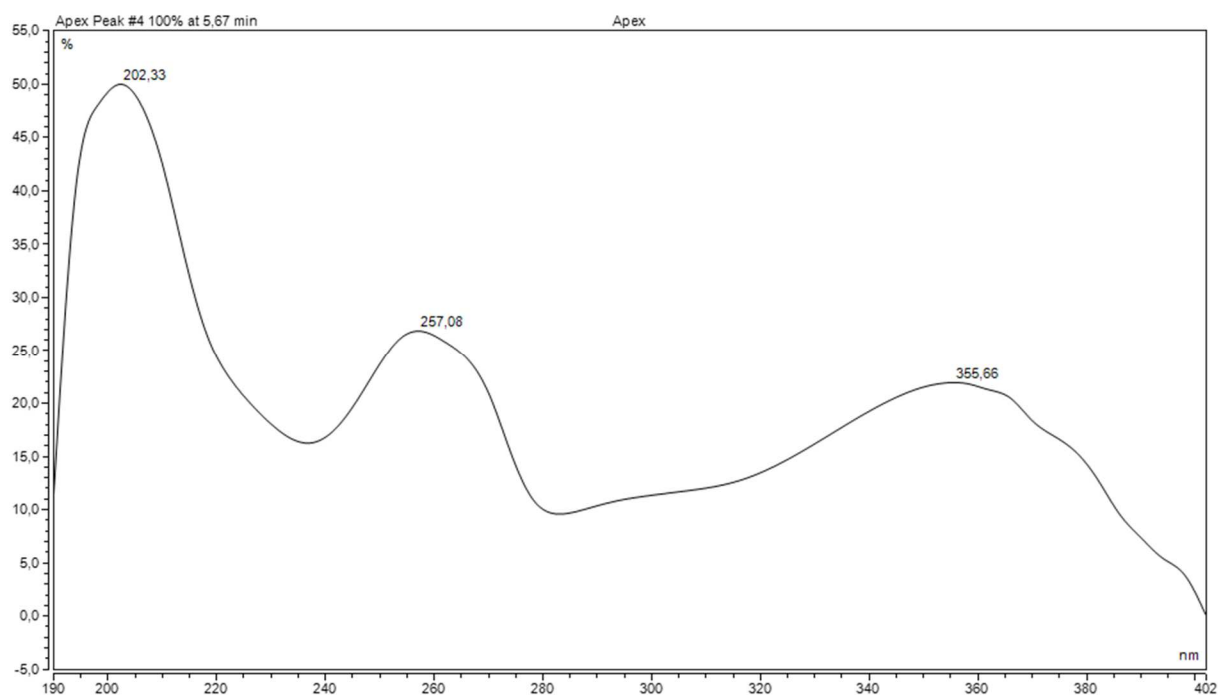

**Supplementary Data 3.** NMR Spectral data of 3-*O*- $\beta$ -D-(4''-*O*-methylglucopyranosyl)-quercetin (**3**):  $^1\text{H}$ -NMR (Acetone- $d_6$ )  $\delta\text{H}$ : 3.18 (1H, t,  $J$  = 9.0 Hz, H-4''), 3.34 (1H, ddd,  $J$  = 9.0, 5.0, 2.3 Hz, 5'-H), 3.50 (1H, t,  $J$  = 7.9 Hz, H-2''), 3.57 (3H, s, C4''-OCH $_3$ ), 3.60-3.66 (2H, m, H-3'' and one of H-6''), 3.73 (1H, dd,  $J$  = 12.0, 2.3 Hz, one of H-6''), 5.27 (1H, d,  $J$  = 7.9 Hz, H-1''), 6.32 (1H, d,  $J$  = 2.2 Hz, H-6), 6.55 (1H, d,  $J$  = 2.2 Hz, H-8), 7.00 (1H, d,  $J$  = 8.4 Hz, H-5'), 7.64 (1H, dd,  $J$  = 8.4, 2.2 Hz, H-6'), 8.04 (1H, d,  $J$  = 2.2 Hz, H-2').  $^{13}\text{C}$ -NMR (DMSO- $d_6$ )  $\delta\text{C}$ : 60.5 (C-4''-OCH $_3$ ), 62.3 (C-6''), 75.7 (C-2''), 77.0 (C-5''), 78.2 (C-3''), 79.8 (C-4''), 94.7 (C-6), 99.8 (C-8), 104.8 (C-1''), 105.5 (C-4a), 115.9 (C-5'), 118.0 (C-2'), 122.7 (C-1'), 122.8 (C-6'), 135.6 (C-3), 145.3 (C-3'), 149.3 (C-4'), 158.0 (C-5), 158.8 (C-2), 162.9 (C-8a), 165.3 (C-7), 179.2 (C-4).

**Figure S13.**  $^1\text{H}$  NMR spectra of 3-O- $\beta$ -D-(4''-O-methylglucopyranosyl)-quercetin (**3**) (600MHz, Acetone- $d_6$ )

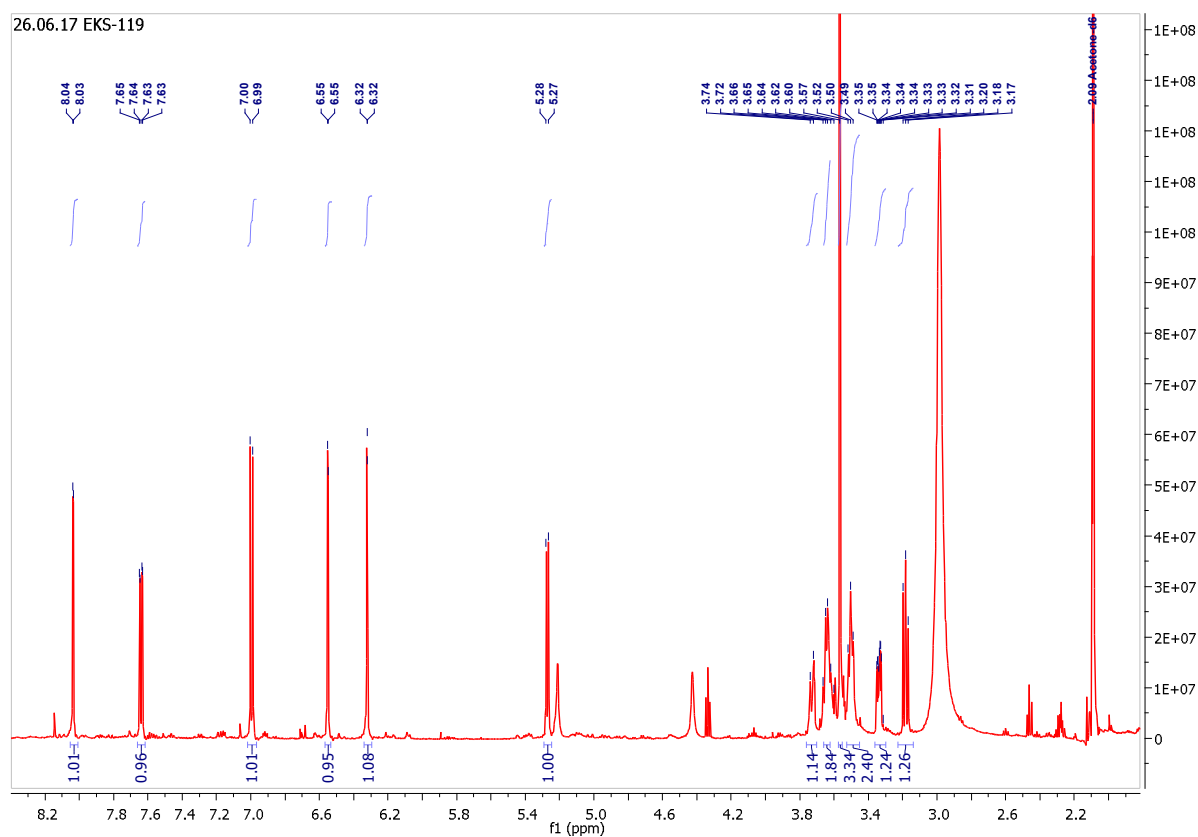

**Figure S14.**  $^{13}\text{C}$  NMR spectra of 3-O- $\beta$ -D-(4''-O-methylglucopyranosyl)-quercetin (**3**) (151 MHz, Acetone- $d_6$ )

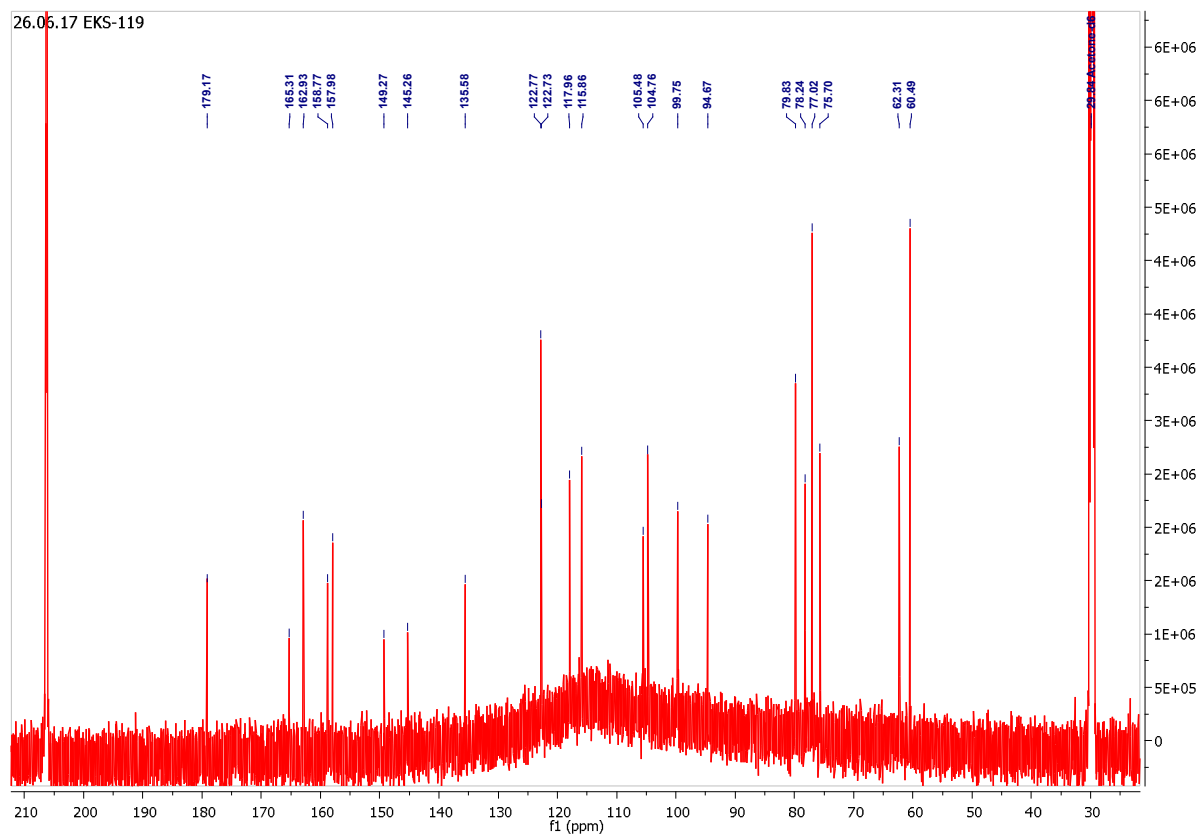

**Figure S15.**  $^1\text{H}$  -  $^1\text{H}$  NMR (COSY) spectrum of quercetin 3-*O*- $\beta$ -D-(4''-*O*-methylglucopyranosyl)-quercetin (**3**) (600 /600 MHz, Acetone- $d_6$ )

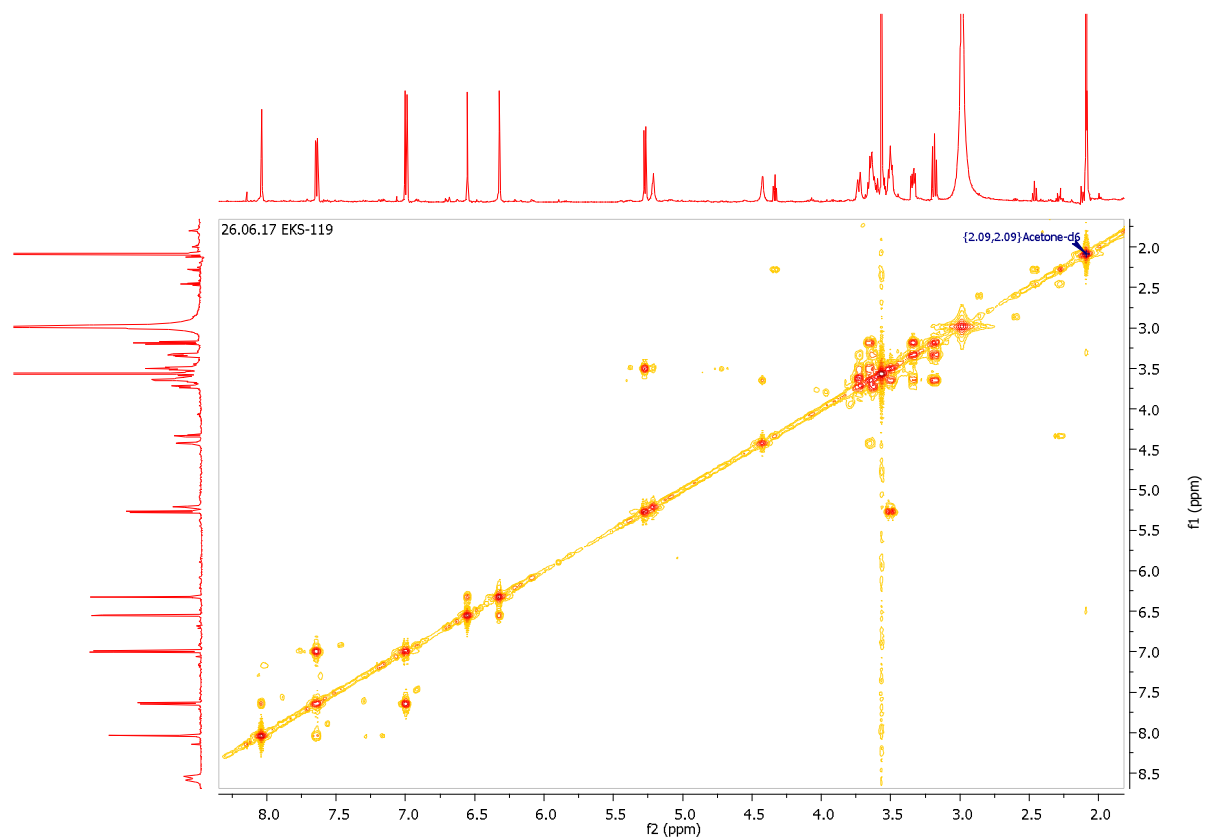

**Figure S16.**  $^1\text{H}$  -  $^{13}\text{C}$  NMR (HSQC) spectrum of quercetin 3-*O*- $\beta$ -D-(4''-*O*-methylglucopyranosyl)-quercetin (**3**) (600 /151 MHz, Acetone- $d_6$ )

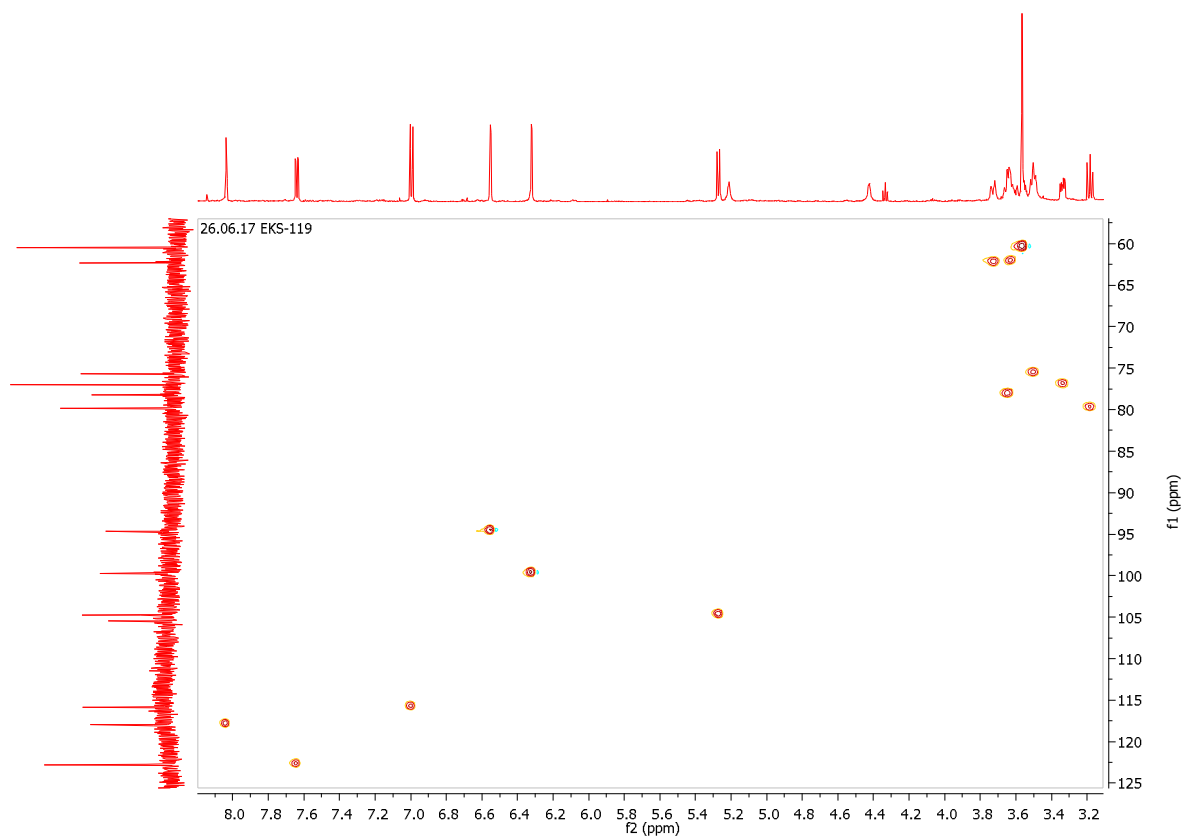

**Figure S17.** Structure of 3-O- $\beta$ -D-(glucopyranosyl)-quercetin (**4**)

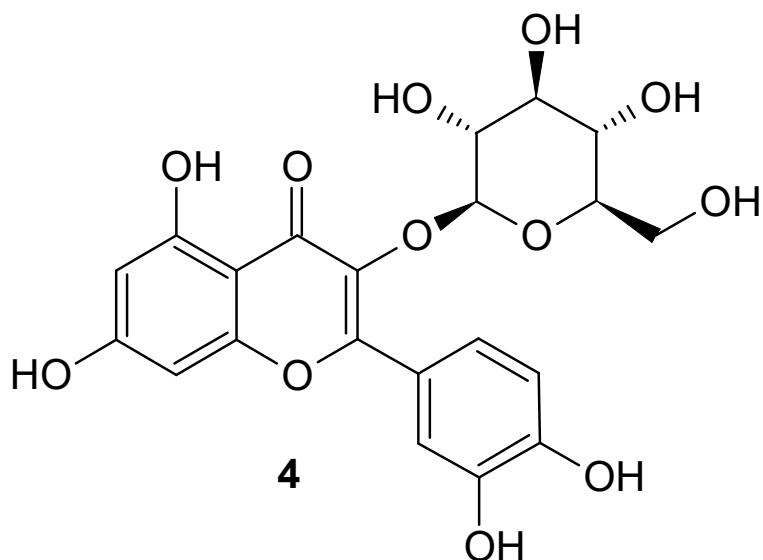

**Figure S18.** UV spectra of 3-O- $\beta$ -D-(glucopyranosyl)-quercetin (**4**)

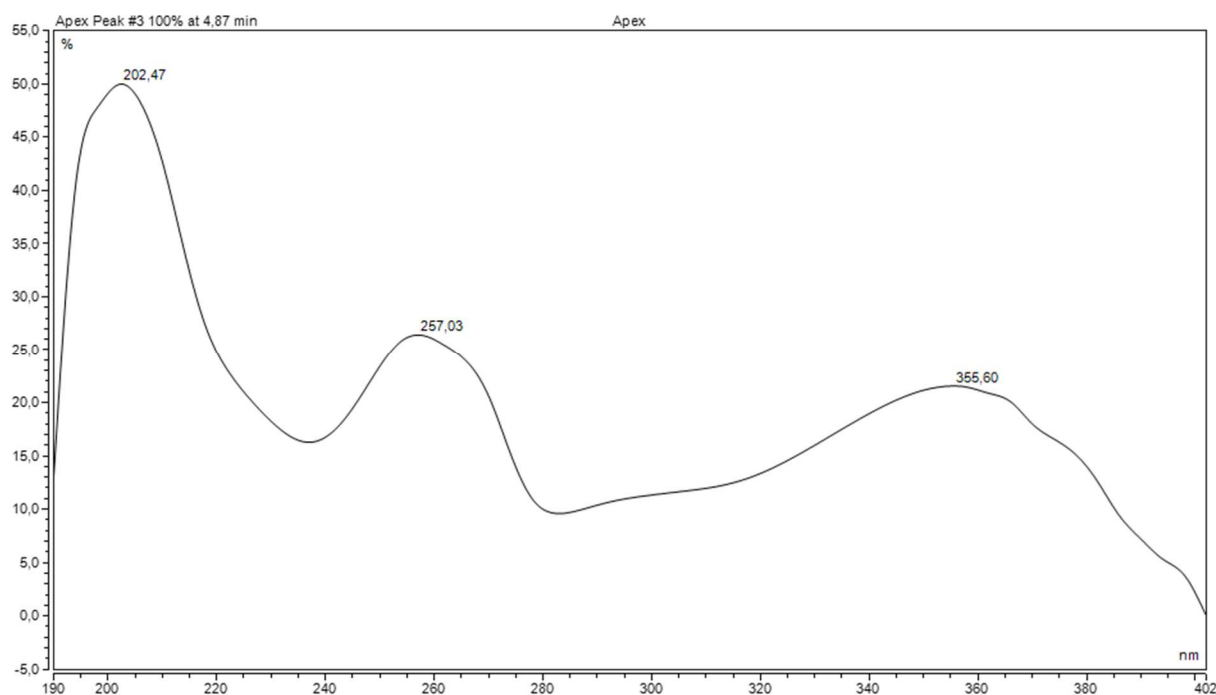

**Supplementary Data 4.** NMR Spectral data of 3-O- $\beta$ -D-(glucopyranosyl)-quercetin (**4**):  $^1\text{H}$ -NMR (Acetone- $d_6$ )  $\delta\text{H}$ : 3.44 (1H, t,  $J$  = 8.8 Hz, H-4''), 3.32-3.37 (1H, m, 5'-H), 3.49-3.55 (2H, m, H-2'' and H-3''), 3.62-3.67 (1H, one of H-6''), 3.78 (1H, dd,  $J$  = 11.2, 2.3 Hz, one of H-6''), 5.30 (1H, d,  $J$  = 7.4 Hz, H-1''), 6.32 (1H, d,  $J$  = 2.1 Hz, H-6), 6.55 (1H, d,  $J$  = 2.1 Hz, H-8), 6.99 (1H, d,  $J$  = 8.4 Hz, H-5'), 7.62 (1H, dd,  $J$  = 8.4, 2.2 Hz, H-6'), 8.04 (1H, d,  $J$  = 2.2 Hz, H-2').  $^{13}\text{C}$ -NMR (DMSO- $d_6$ )  $\delta\text{C}$ : 62.7 (C-6''), 75.5 (C-2''), 77.8 (C-5''), 78.1 (C-3''), 70.9 (C-4''), 94.7 (C-6), 99.7 (C-8), 105.0 (C-1''), 105.4 (C-4a), 115.8 (C-5'), 117.9 (C-2'), 122.6 (C-6'), 122.7 (C-1'), 135.6 (C-3), 145.3 (C-3'), 149.3 (C-4'), 158.0 (C-5), 158.8 (C-2), 162.9 (C-8a), 165.4 (C-7), 179.2 (C-4).

**Figure S19.**  $^1\text{H}$  NMR spectra of 3-O- $\beta$ -D-(glucopyranosyl)-quercetin (**4**) (600MHz, Acetone- $d_6$ )

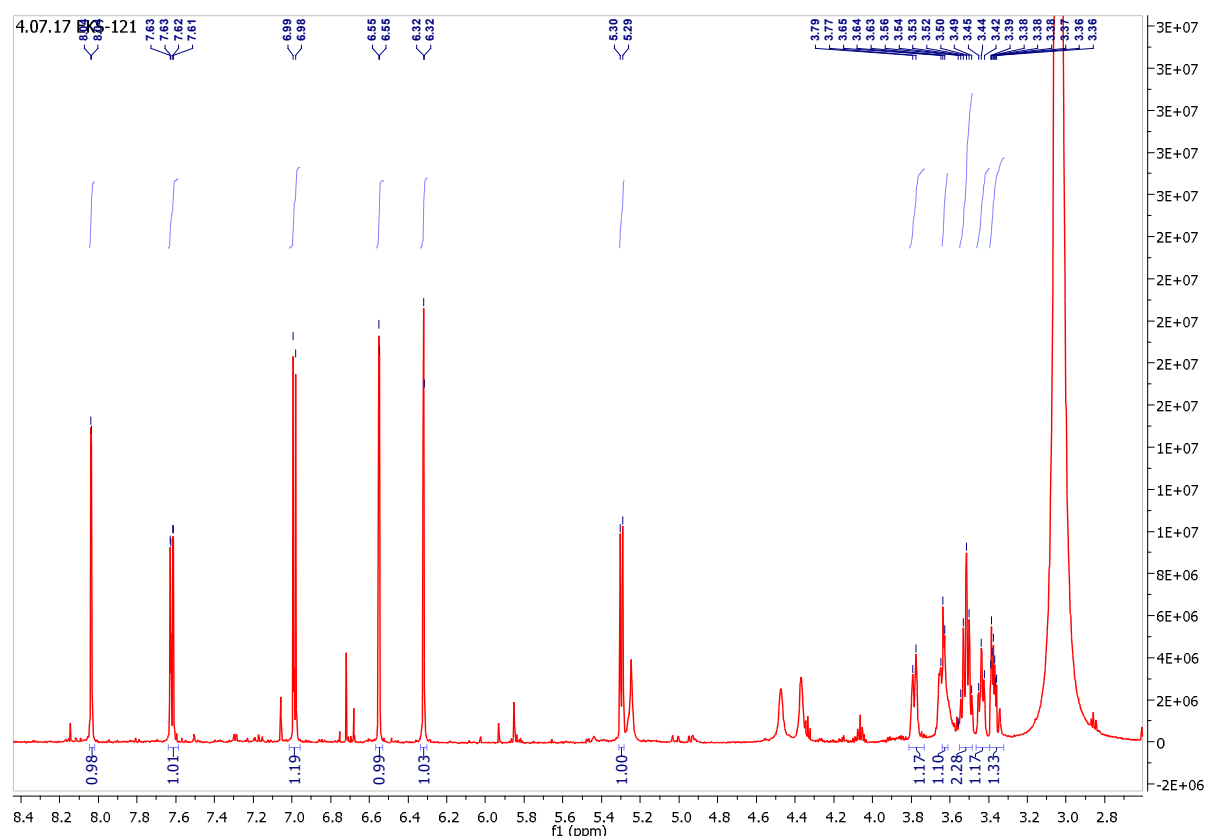

**Figure S20.**  $^{13}\text{C}$  NMR spectra of 3-O- $\beta$ -D-(glucopyranosyl)-quercetin (**4**) (151 MHz, Acetone- $d_6$ )

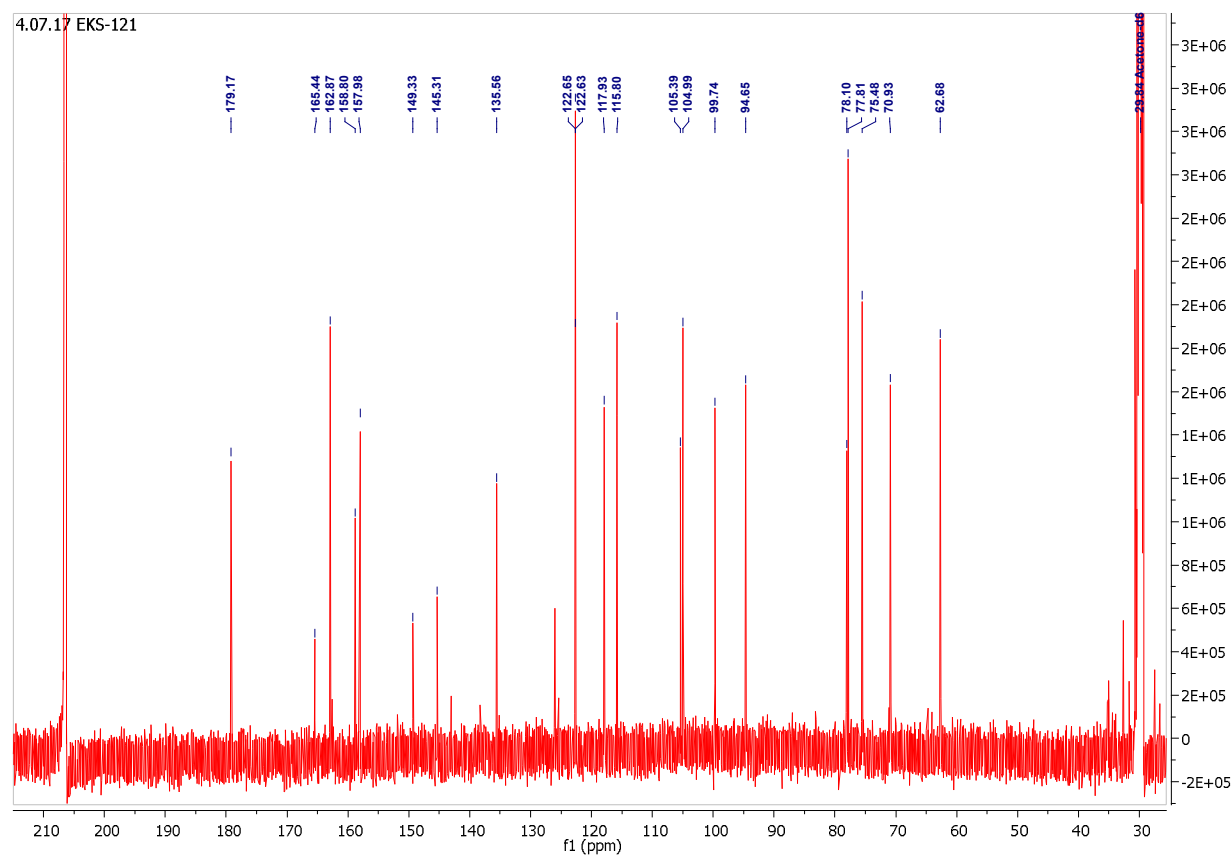

**Figure S21.**  $^1\text{H}$ - $^1\text{H}$  NMR (COSY) spectrum of quercetin 3-O- $\beta$ -D-(glucopyranosyl)-quercetin (**4**) (600/600 MHz, Acetone- $d_6$ )

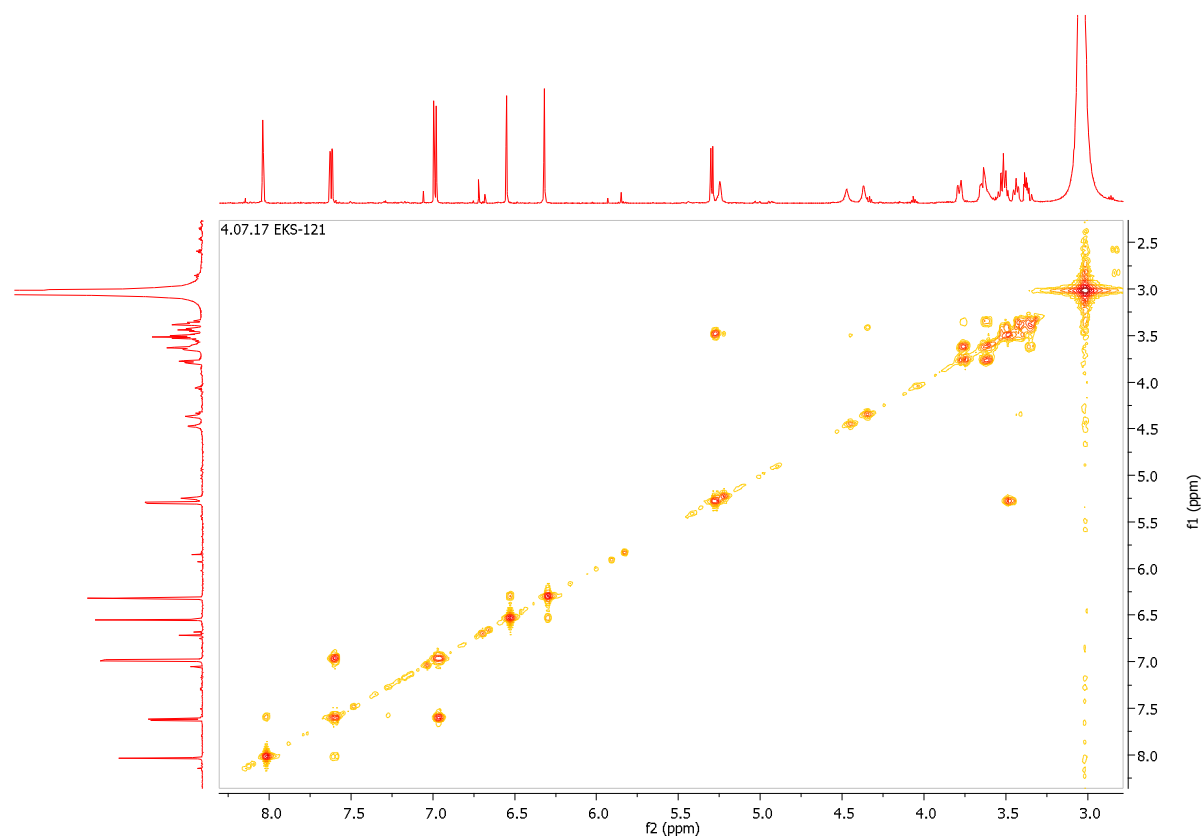

**Figure S22.**  $^1\text{H}$ - $^{13}\text{C}$  NMR (HSQC) spectrum of quercetin 3-O- $\beta$ -D-(glucopyranosyl)-quercetin (**4**) (600/151 MHz, Acetone- $d_6$ )

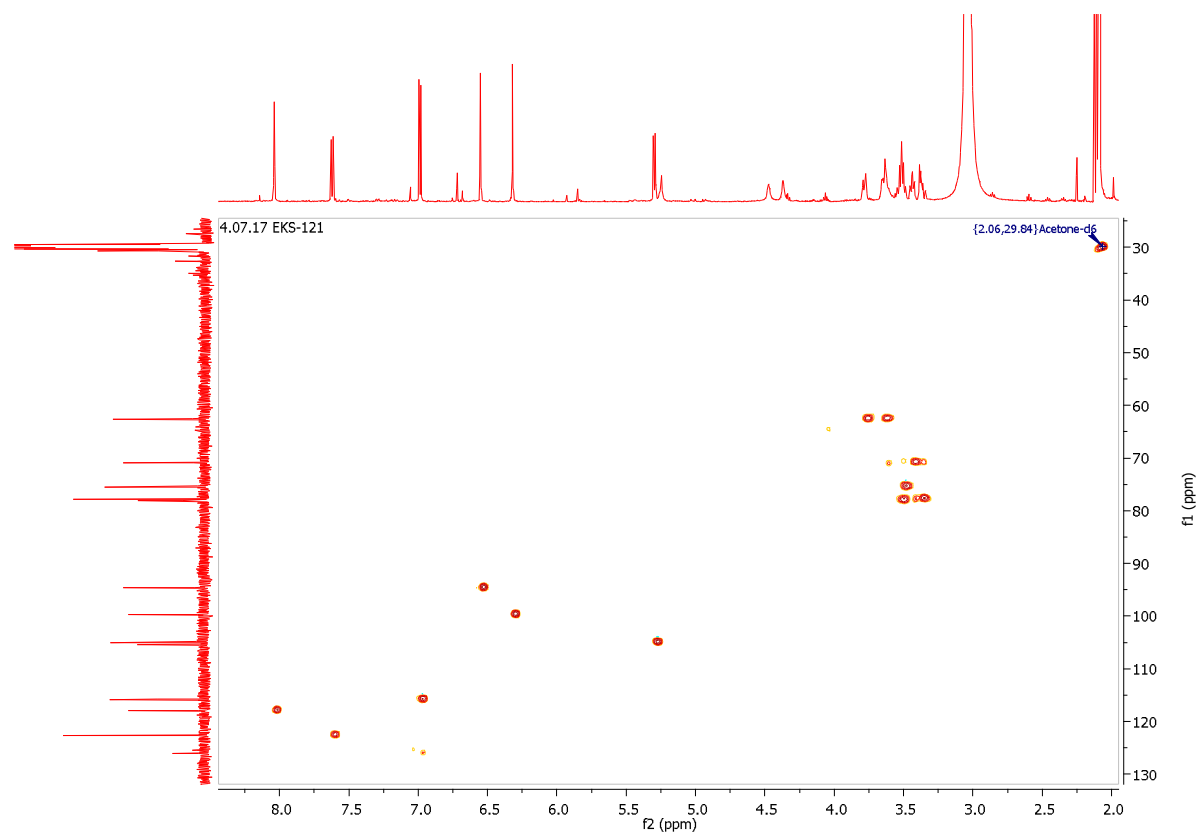

**Figure S23.** Selected chromatograms showing progress of quercetin (**1**) biotransformation in the cultures of entomopathogenic filamentous fungi.

**Black** - composition of products and unreacted substrate after the first day of biotransformation.

**Blue** - composition of products and unreacted substrate after the third day of biotransformation.

**Pink** - composition of products and unreacted substrate after the seventh day of biotransformation.

**Brown** - composition of products and unreacted substrate after the tenth day of biotransformation.

**Retention time ( $t_R$ ) of compounds 1-4:**

quercetin (**1**),  $t_R = 7.96$  min;

7-O- $\beta$ -D-(4''-O-methylglucopyranosyl)-quercetin (**2**)  $t_R = 4.52$  min;

3-O- $\beta$ -D-(4''-O-methylglucopyranosyl)-quercetin (**3**)  $t_R = 5.67$  min;

3-O- $\beta$ -D-(glucopyranosyl)-quercetin (**4**)  $t_R = 4.87$  min;

a) *Beauveria bassiana* KCh J1.5

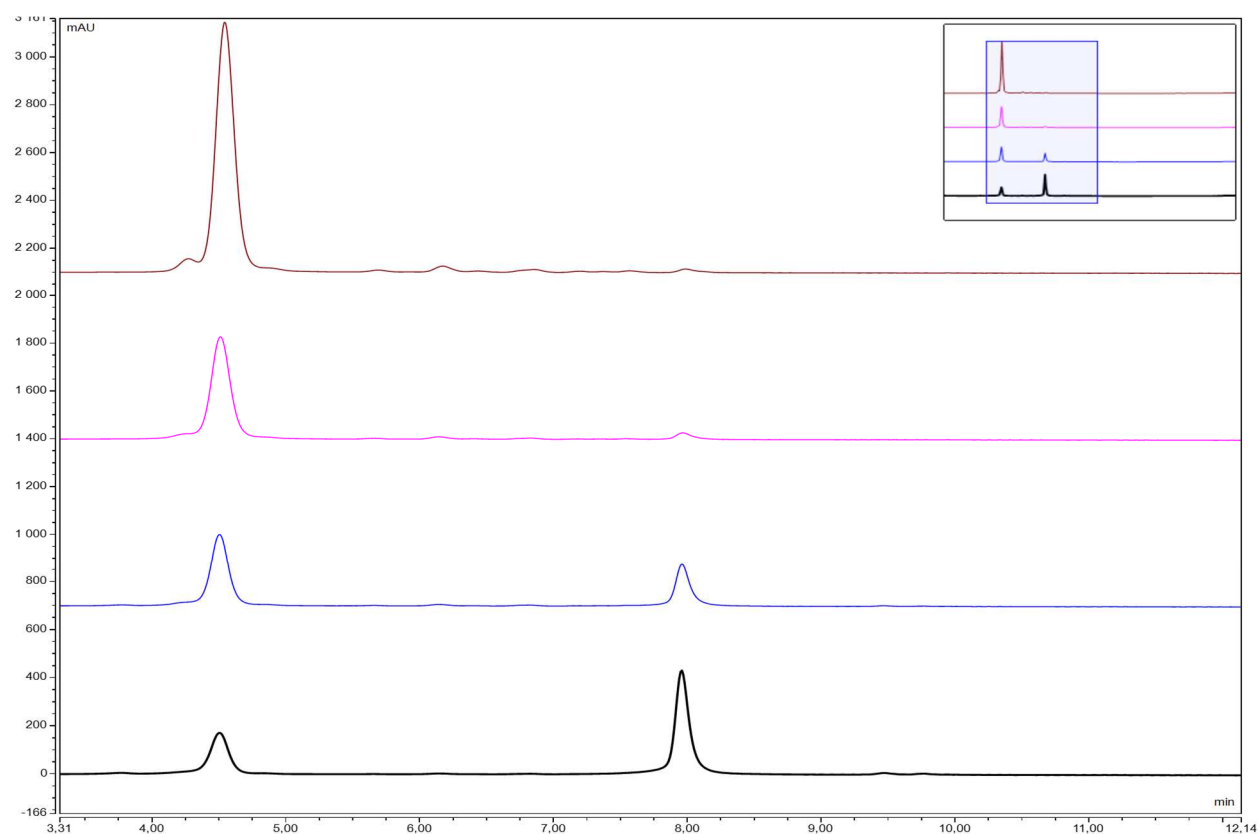

b) *Beauveria bassiana* KCh BBT

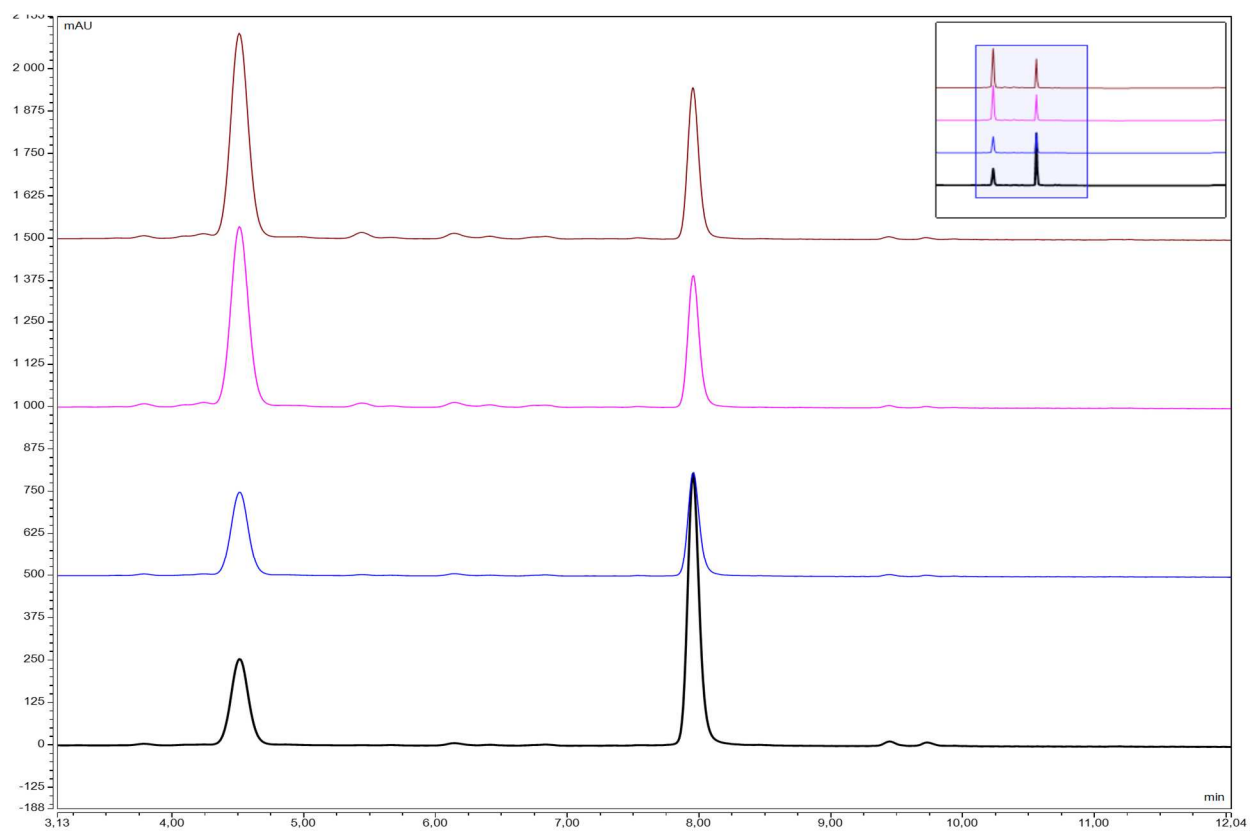

c) *Beauveria bassiana* KCh J3.2

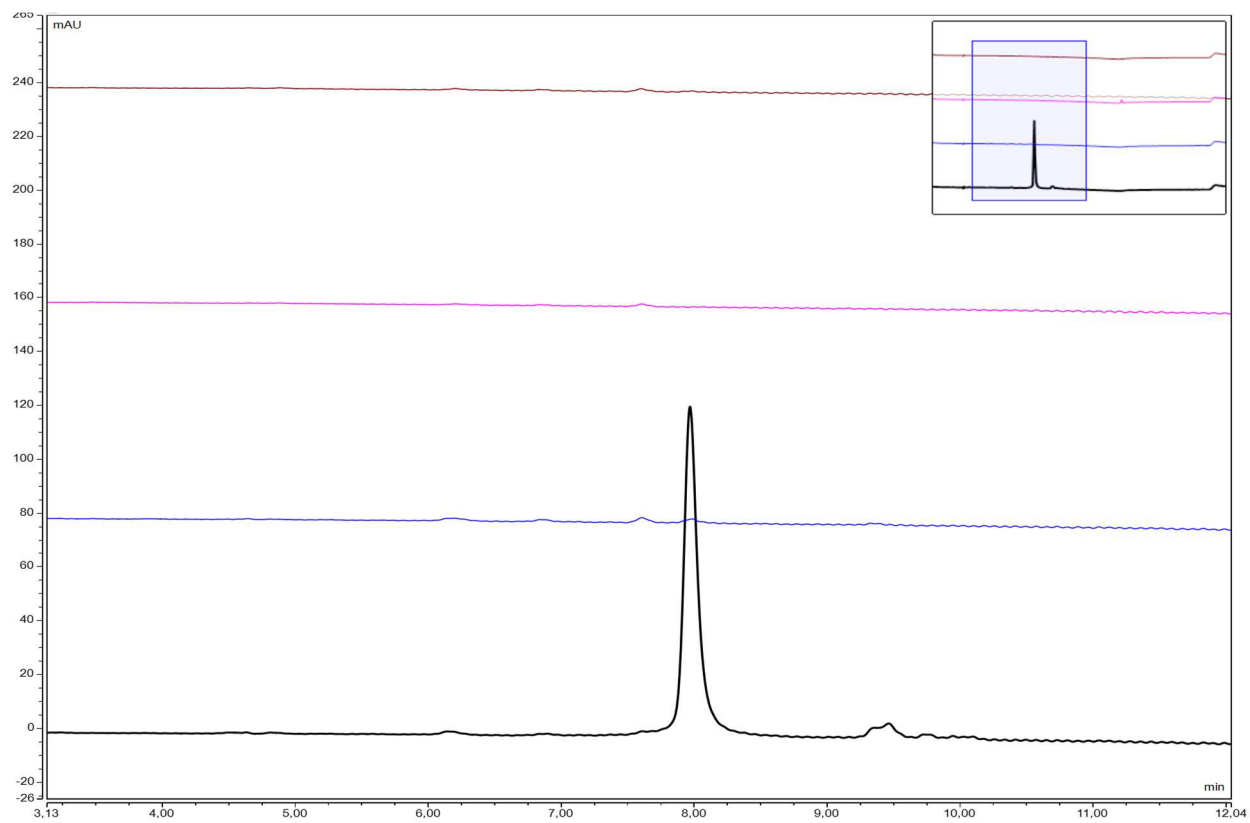



d) *Beauveria bassiana* KCh J2.1

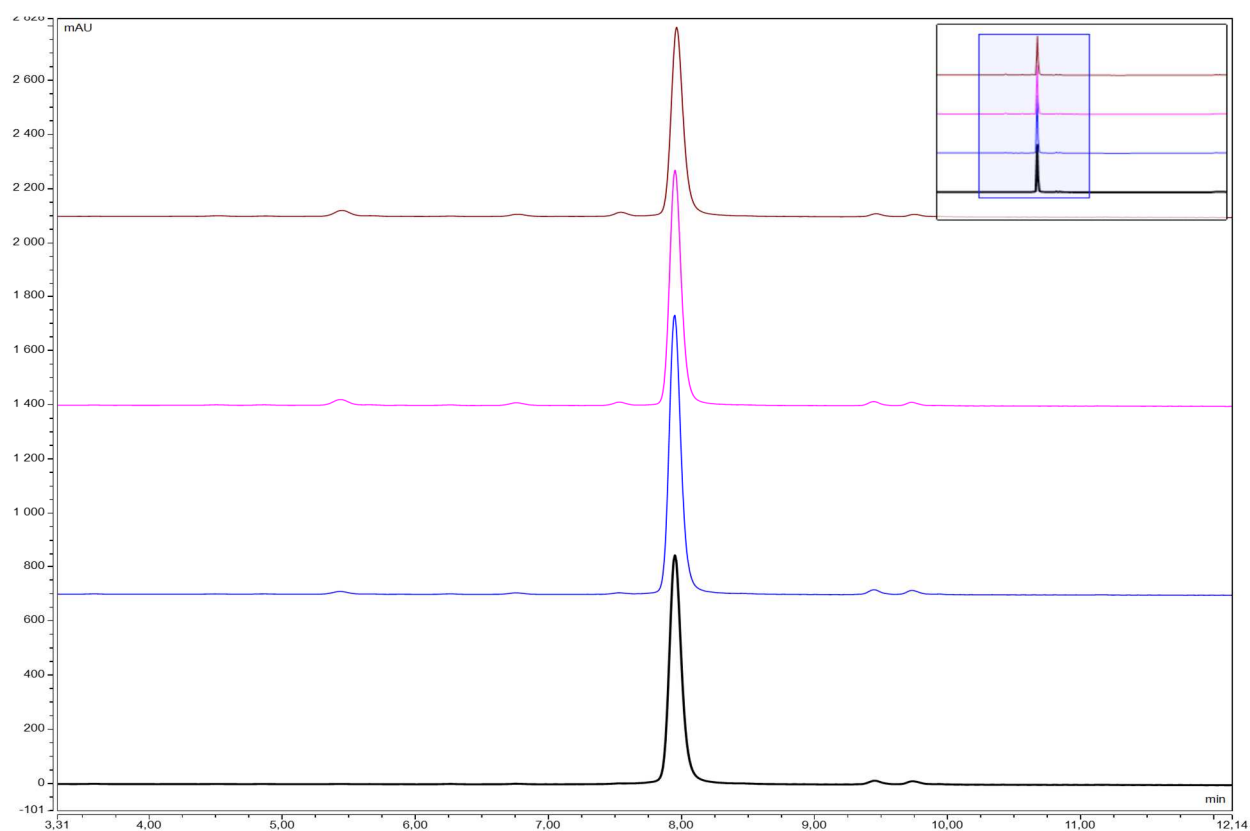

e) *Beauveria bassiana* KCh J1

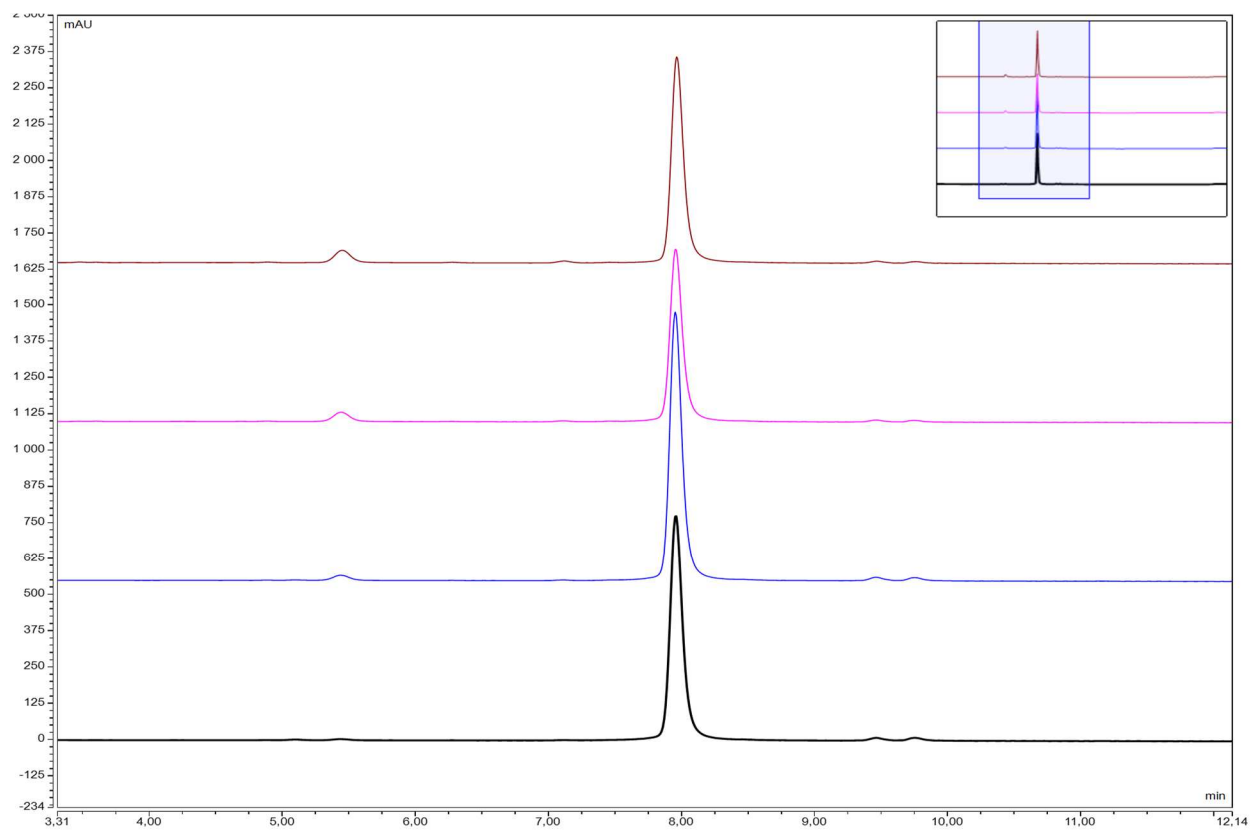

f) *Beauveria caledonica* KCh J3.3

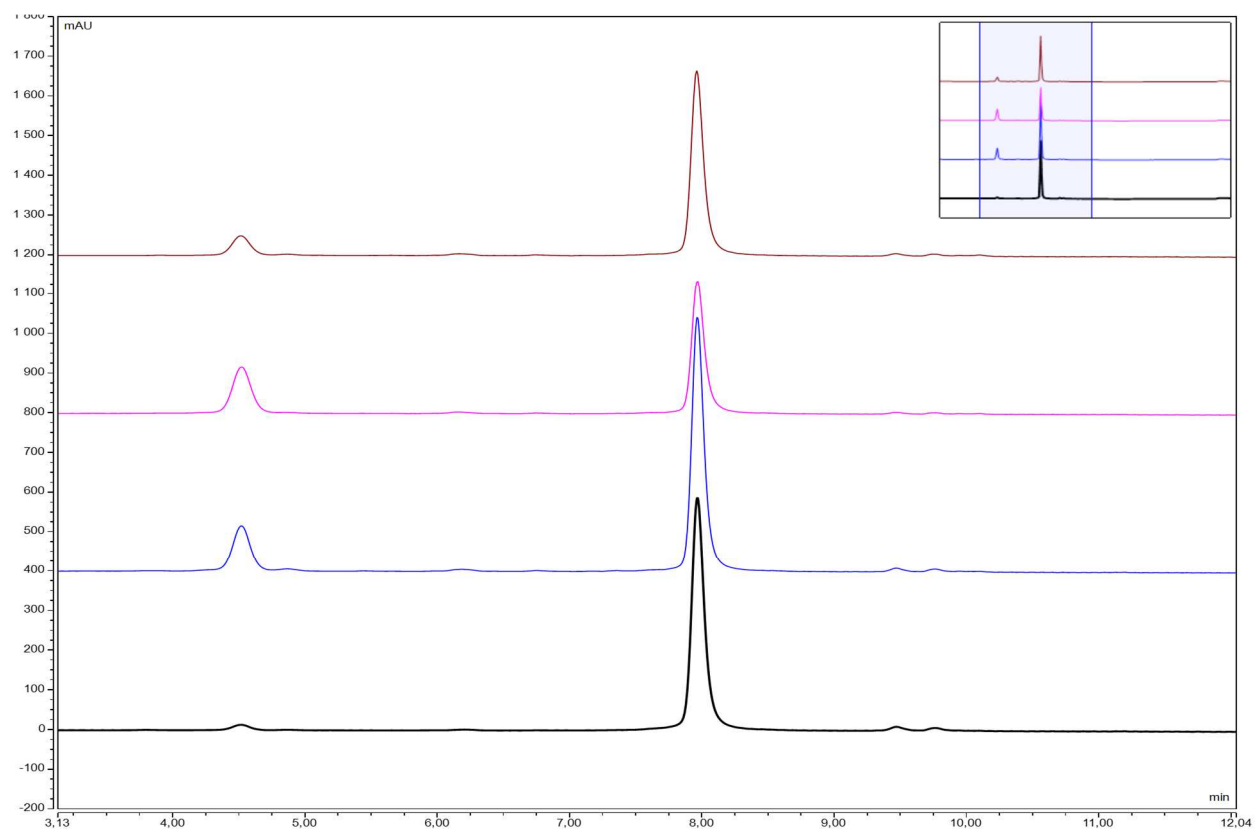

g) *Beauveria caledonica* KCh J3.4

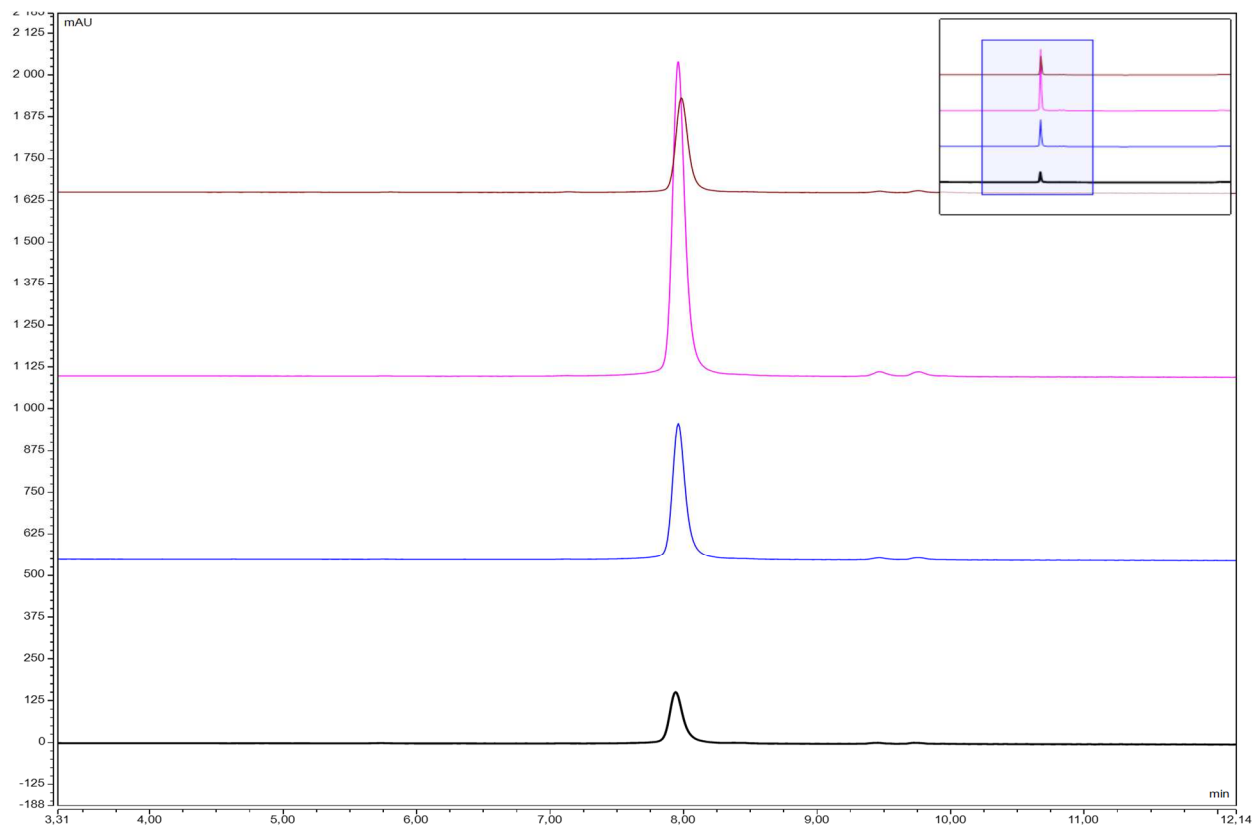

h) *Isaria farinosa* KCh KW 1.1

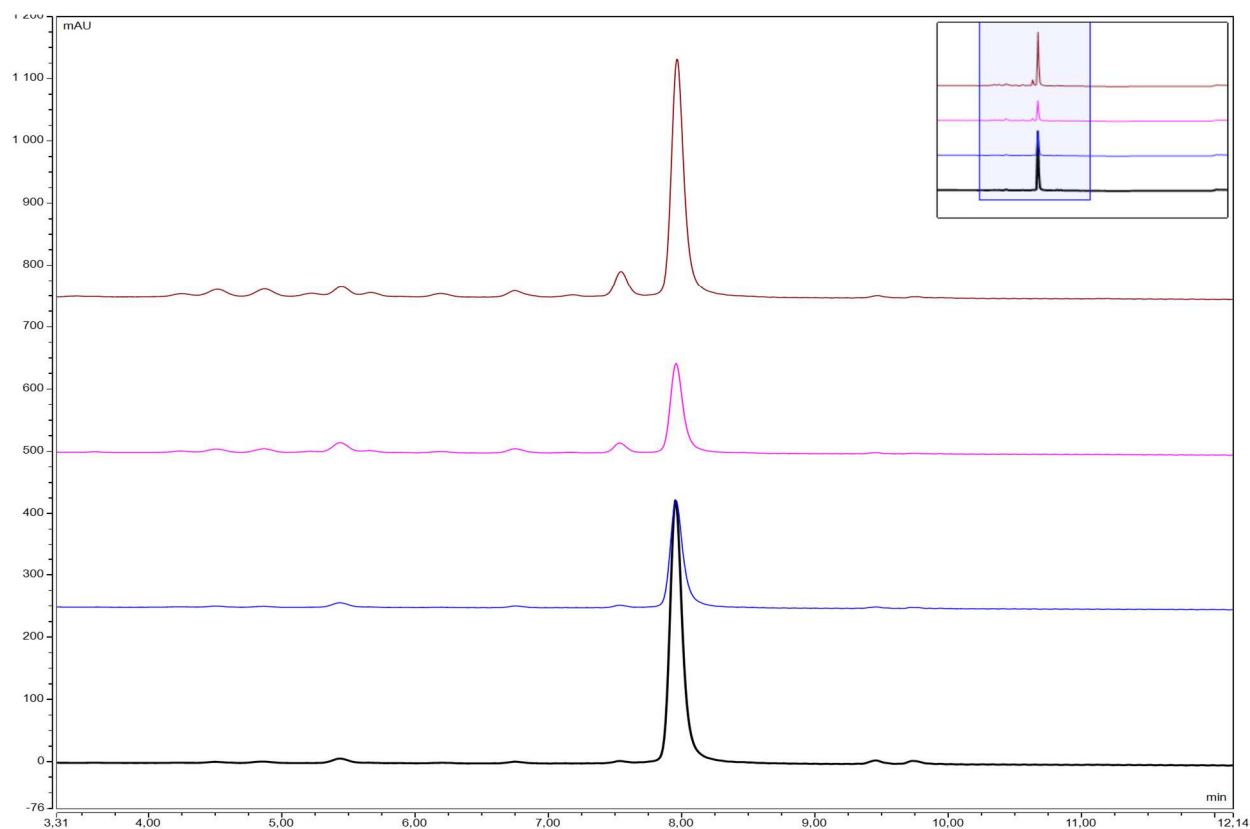

i) *Isaria tenuipes* MU35

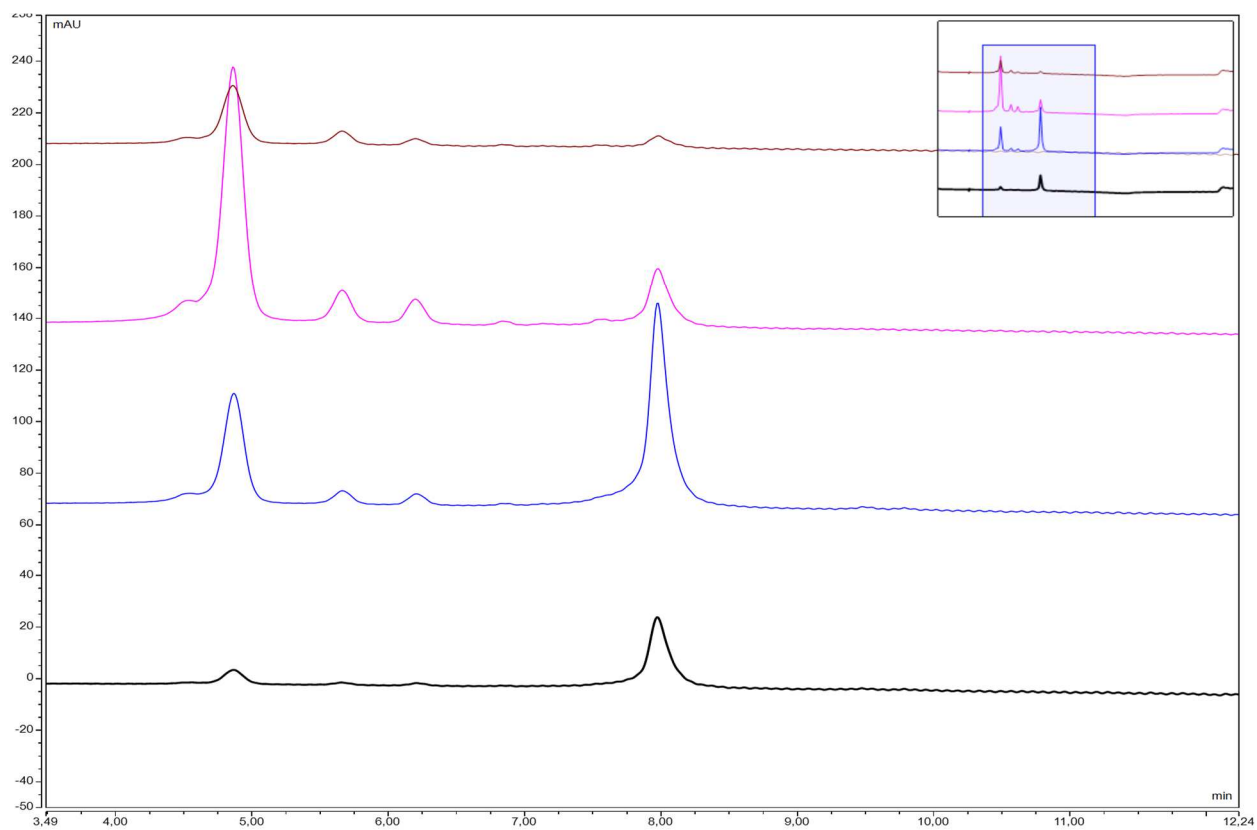

j) *Isaria tenuipes* CYS30

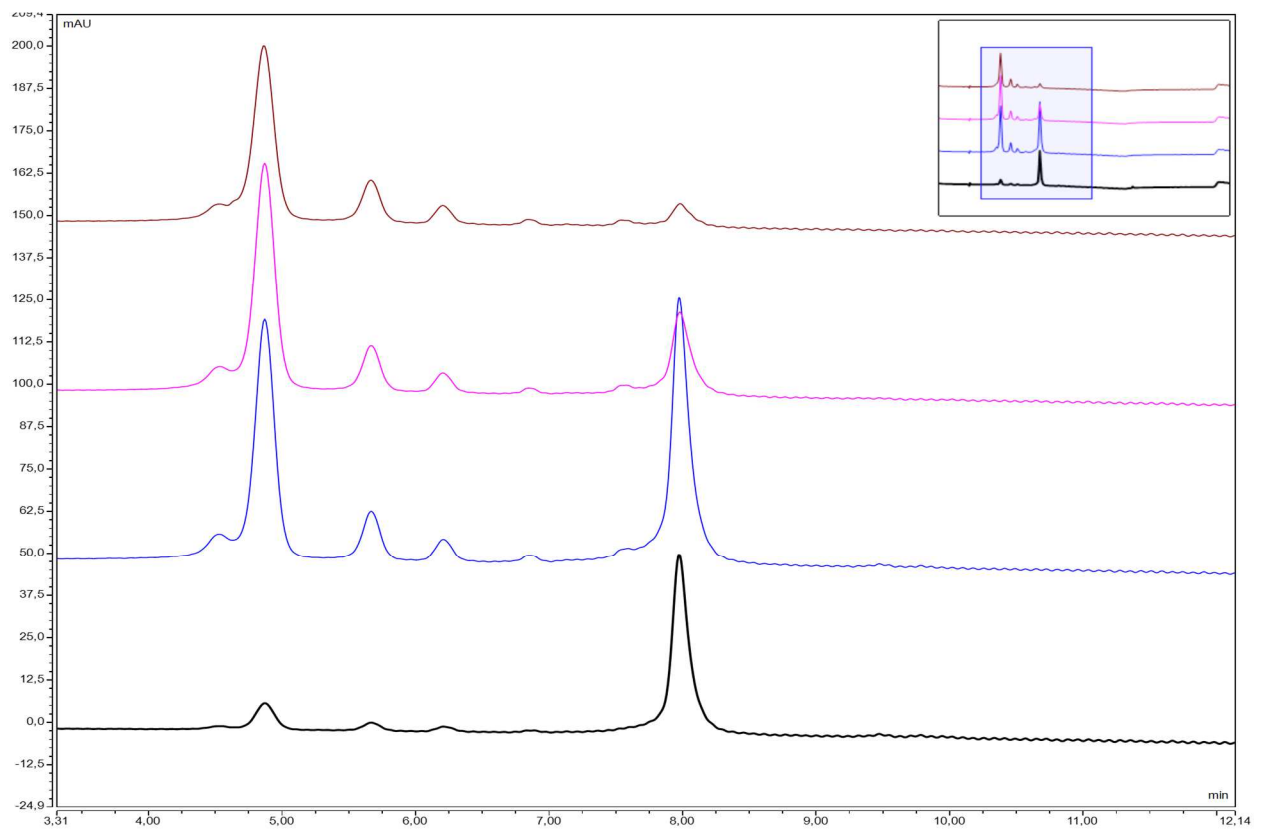

k) *Metapochonia bulbillosa* CYS17

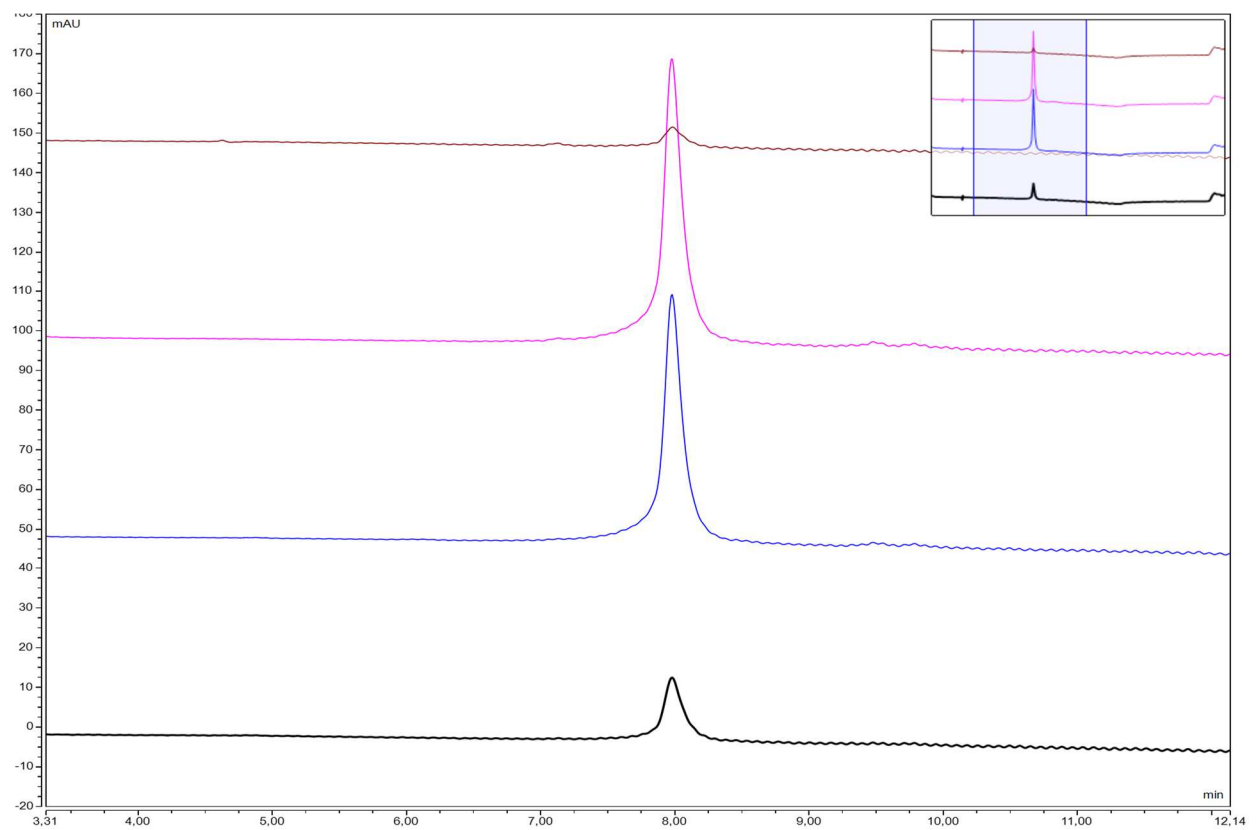

l) *Beauveria feline* ENC3

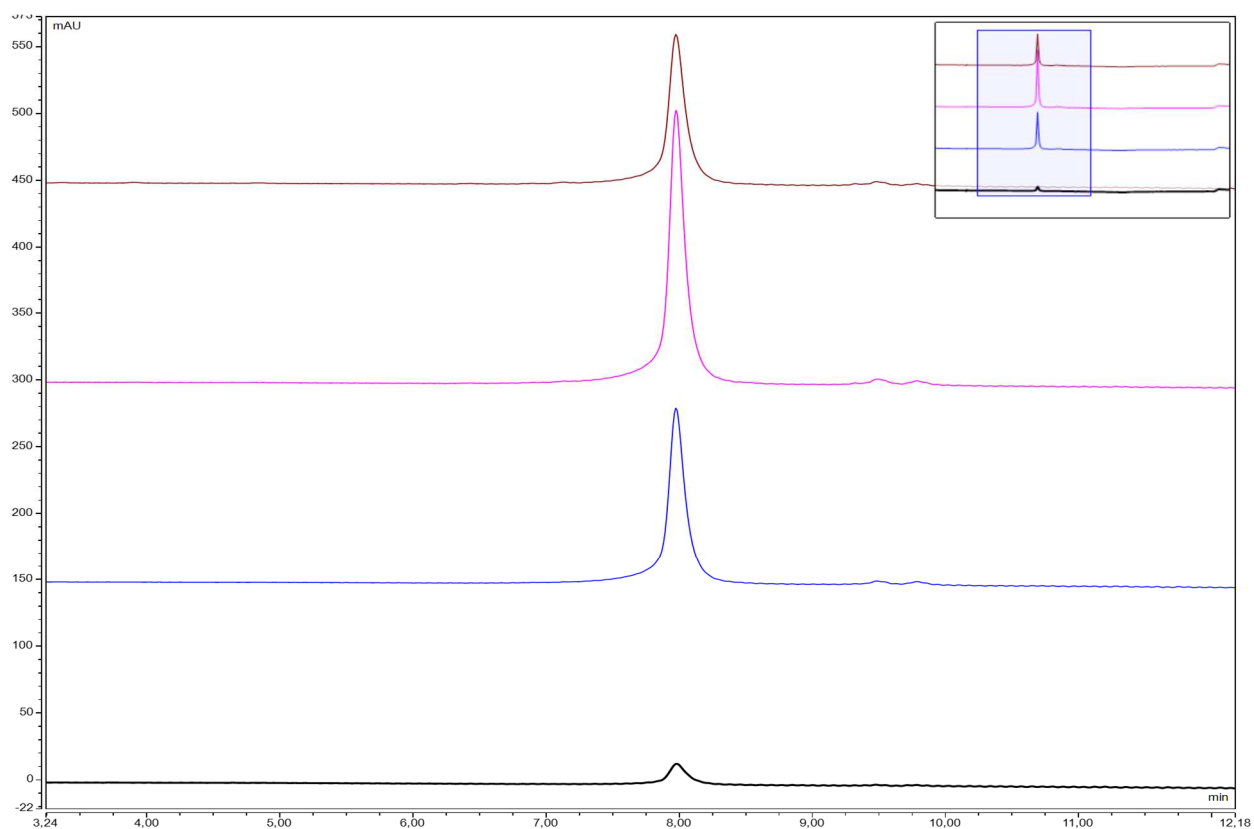

m) *Lecanicillium lecanii* DSM 63098

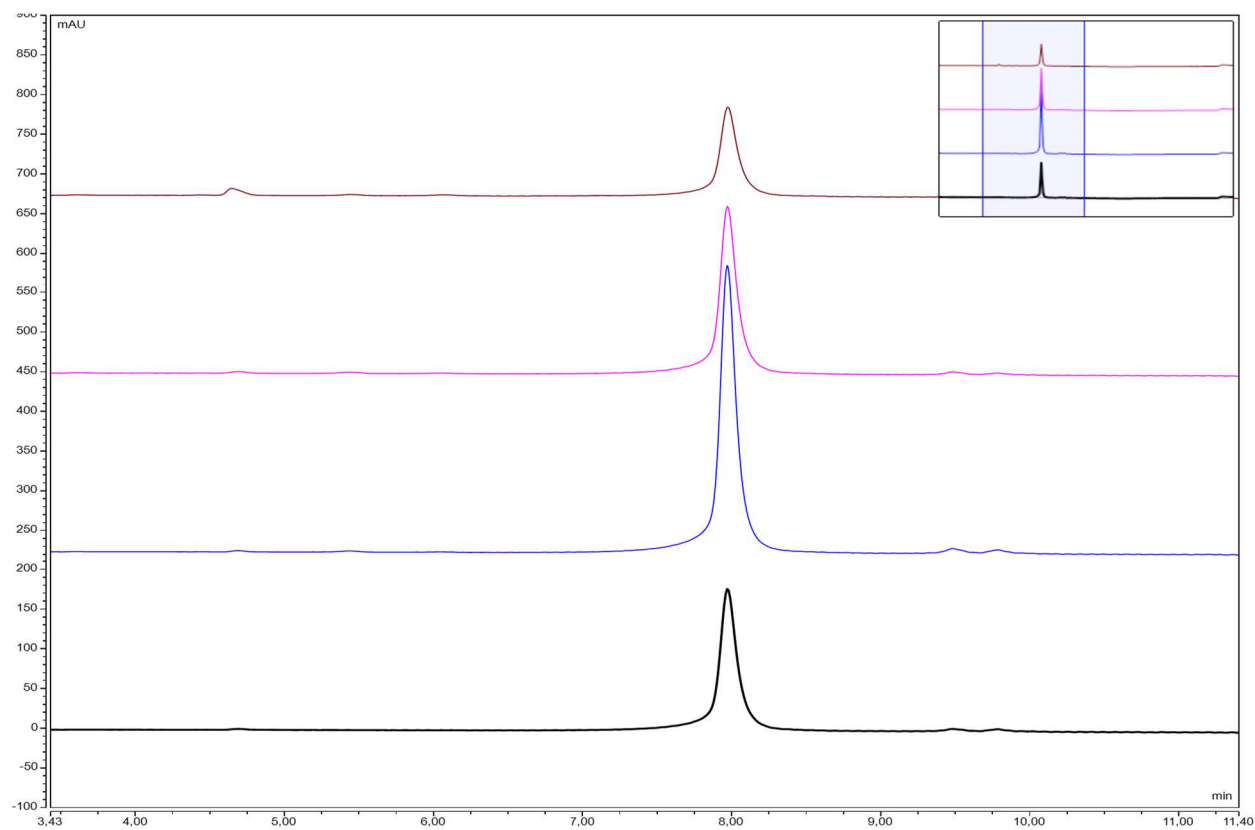

n) *Lecanicillium lecanii* NK3

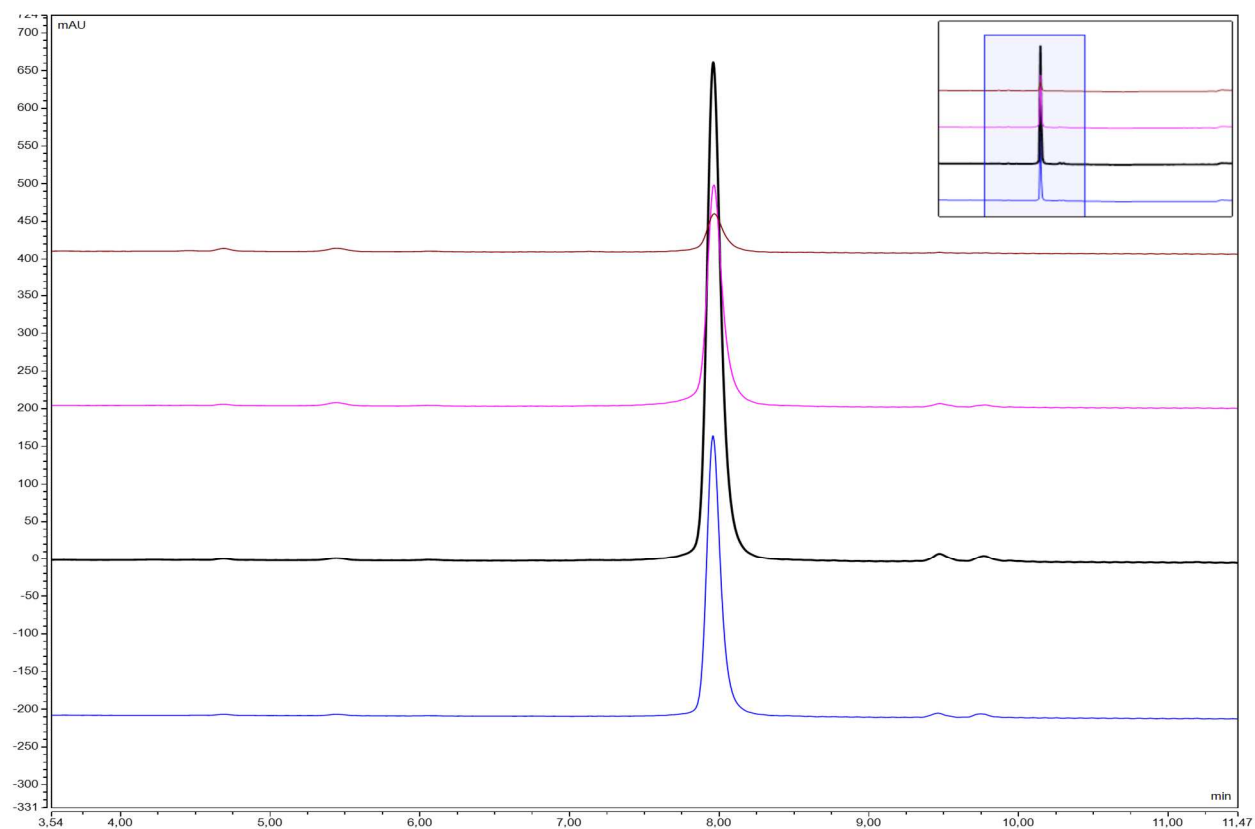

o) *Metarhizium anisopliae* MU4

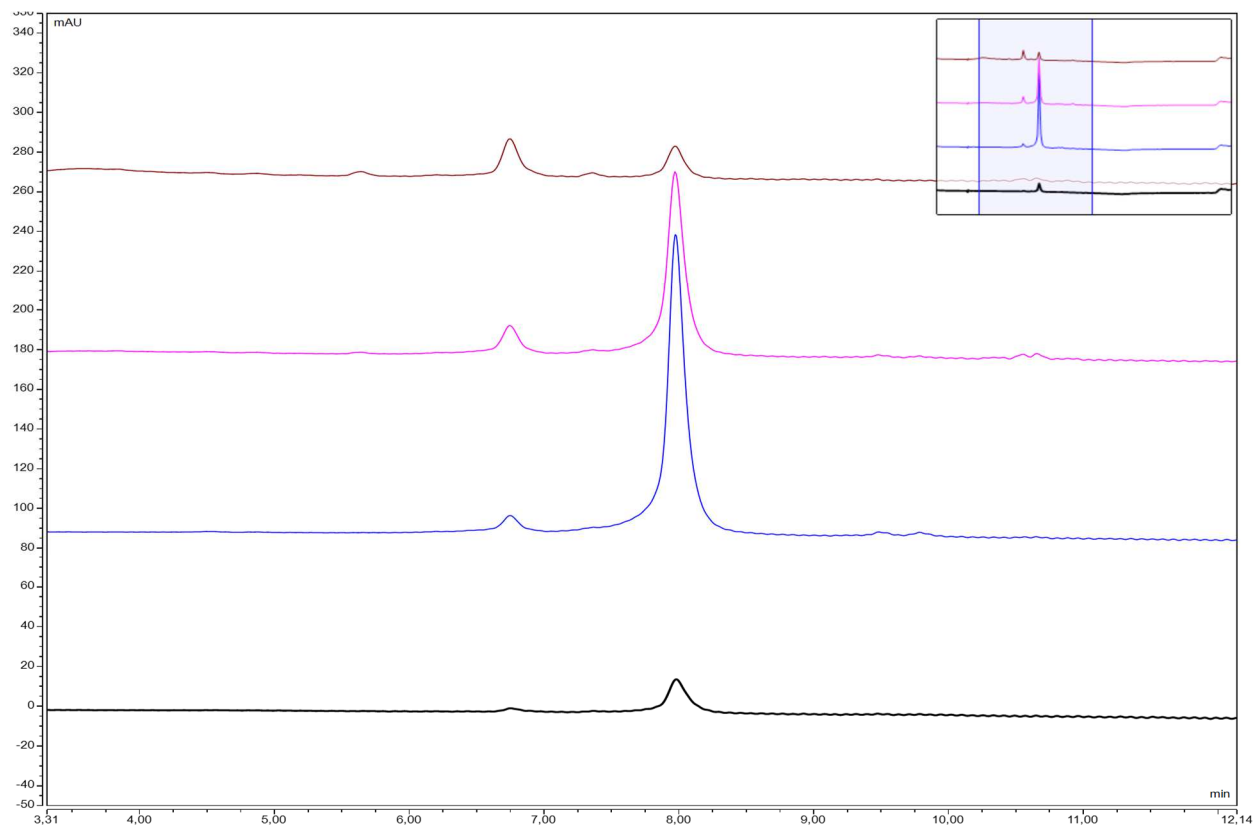

**Table S2a.** Microbial transformation of quercetin, HPLC conversion expressed by means and standard deviation.

| Strain                               | Time of<br>biotransformation<br>[days] | Conversion [%] after 1, 3, 7 and 10 days of biotransformation |            |            |            |                   |
|--------------------------------------|----------------------------------------|---------------------------------------------------------------|------------|------------|------------|-------------------|
|                                      |                                        | Substrate<br>(1)                                              | Products   |            |            | Other<br>products |
|                                      |                                        |                                                               | 2          | 3          | 4          |                   |
| <i>Beauveria bassiana</i> KCh J1.5   | 1                                      | 64.3 ± 3.7                                                    | 35.7 ± 3.7 | 0 -        | 0 -        | 0 -               |
|                                      | 3                                      | 30.2 ± 2.4                                                    | 69.8 ± 2.4 | 0 -        | 0 -        | 0 -               |
|                                      | 7                                      | 3.9 ± 0.3                                                     | 96.1 ± 0.3 | 0 -        | 0 -        | 0 -               |
|                                      | 10                                     | 0.7 ± 0.1                                                     | 99.3 ± 0.1 | 0 -        | 0 -        | 0 -               |
| <i>Beauveria bassiana</i> KCh BBT    | 1                                      | 68.3 ± 0.8                                                    | 31.7 ± 0.8 | 0 -        | 0 -        | 0 -               |
|                                      | 3                                      | 44.3 ± 2.5                                                    | 55.7 ± 2.5 | 0 -        | 0 -        | 0 -               |
|                                      | 7                                      | 31.9 ± 1.7                                                    | 68.1 ± 1.7 | 0 -        | 0 -        | 0 -               |
|                                      | 10                                     | 28.0 ± 2.5                                                    | 72.0 ± 2.5 | 0 -        | 0 -        | 0 -               |
| <i>Beauveria bassiana</i> KCh J3.2   | 1                                      | 95.0 ± 0.2                                                    | 0 -        | 0 -        | 0 -        | 5.0 ± 0.2         |
|                                      | 3                                      | 0.8 ± 0.8                                                     | 4.4 ± 0.7  | 0 -        | 0 -        | 94.8 ± 1.5        |
|                                      | 7                                      | 0 -                                                           | 0 -        | 0 -        | 0 -        | >99 -             |
|                                      | 10                                     | 0 -                                                           | 0 -        | 0 -        | 0 -        | >99 -             |
| <i>Beauveria bassiana</i> KCh J2.1   | 1                                      | 99.8 ± 0.1                                                    | 0.0 -      | 0 -        | 0 -        | 0.2 ± 0.1         |
|                                      | 3                                      | 98.3 ± 0.5                                                    | 0.3 ± 0.2  | 0 -        | 0 -        | 1.4 ± 0.3         |
|                                      | 7                                      | 95.9 ± 1.2                                                    | 0.8 ± 0.3  | 0 -        | 0 -        | 3.4 ± 1.0         |
|                                      | 10                                     | 91.4 ± 4.0                                                    | 1.9 ± 1.2  | 0 -        | 0 -        | 6.7 ± 2.9         |
| <i>Beauveria bassiana</i> KCh J1     | 1                                      | 98.7 ± 0.6                                                    | 0 -        | 0 -        | 0 -        | 1.3 ± 0.6         |
|                                      | 3                                      | 97.7 ± 0.7                                                    | 0 -        | 0 -        | 0 -        | 2.3 ± 0.7         |
|                                      | 7                                      | 96.8 ± 0.4                                                    | 0 -        | 0 -        | 0 -        | 3.2 ± 0.5         |
|                                      | 10                                     | 95.4 ± 0.6                                                    | 0 -        | 0 -        | 0 -        | 4.6 ± 0.6         |
| <i>Beauveria caledonica</i> KCh J3.3 | 1                                      | 96.9 ± 0.3                                                    | 3.1 ± 0.3  | 0 -        | 0 -        | 0 -               |
|                                      | 3                                      | 80.3 ± 2.4                                                    | 19.6 ± 2.4 | 0 -        | 0 -        | 0 -               |
|                                      | 7                                      | 67.6 ± 3.3                                                    | 32.4 ± 3.3 | 0 -        | 0 -        | 0 -               |
|                                      | 10                                     | 49.7 ± 4.0                                                    | 13.0 ± 0.5 | 0 -        | 0 -        | 37.2 ± 4.1        |
| <i>Beauveria caledonica</i> KCh J3.4 | 1                                      | 99.8 ± 0.1                                                    | 0 -        | 0 -        | 0 -        | 0.2 ± 0.1         |
|                                      | 3                                      | 99.6 ± 0.0                                                    | 0 -        | 0 -        | 0 -        | 0.4 ± 0.1         |
|                                      | 7                                      | 99.3 ± 0.2                                                    | 0 -        | 0 -        | 0 -        | 0.7 ± 0.2         |
|                                      | 10                                     | 99.0 ± 0.2                                                    | 0 -        | 0 -        | 0 -        | 1.0 ± 0.2         |
| <i>Isaria farinosa</i> KCh KW 1.1.   | 1                                      | 95.8 ± 0.9                                                    | 0.4 ± 0.1  | 0.1 ± 0.0  | 0.6 ± 0.1  | 3.1 ± 0.8         |
|                                      | 3                                      | 92.0 ± 1.5                                                    | 1.5 ± 0.4  | 0.8 ± 0.3  | 1.9 ± 0.3  | 3.8 ± 0.7         |
|                                      | 7                                      | 86.2 ± 0.1                                                    | 2.9 ± 0.3  | 1.5 ± 0.3  | 3.4 ± 0.0  | 6.0 ± 0.3         |
|                                      | 10                                     | 79.6 ± 0.8                                                    | 2.8 ± 0.2  | 0.8 ± 0.1  | 3.5 ± 0.2  | 13.4 ± 0.9        |
| <i>Isaria tenuipes</i> MU35          | 1                                      | 79.8 ± 1.6                                                    | 1.7 ± 0.0  | 2.0 ± 0.3  | 16.4 ± 1.4 | 0 -               |
|                                      | 3                                      | 61.0 ± 2.8                                                    | 2.6 ± 0.2  | 3.3 ± 0.2  | 33.1 ± 2.4 | 0 -               |
|                                      | 7                                      | 18.6 ± 5.1                                                    | 4.2 ± 1.2  | 7.0 ± 1.1  | 70.2 ± 3.0 | 0 -               |
|                                      | 10                                     | 10.4 ± 0.3                                                    | 5.9 ± 0.9  | 12.1 ± 2.2 | 67.2 ± 0.8 | 4.4 ± 1.8         |
| <i>Isaria tenuipes</i> CYS30         | 1                                      | 82.2 ± 1.6                                                    | 1.5 ± 0.3  | 3.2 ± 0.7  | 13.2 ± 0.8 | 0 -               |
|                                      | 3                                      | 43.3 ± 2.6                                                    | 4.2 ± 0.8  | 6.8 ± 1.9  | 45.6 ± 3.4 | 0 -               |
|                                      | 7                                      | 23.5 ± 6.1                                                    | 5.9 ± 0.2  | 9.8 ± 2.1  | 60.8 ± 4.0 | 0 -               |
|                                      | 10                                     | 11.0 ± 2.5                                                    | 7.0 ± 0.8  | 13.1 ± 3.1 | 69.0 ± 1.7 | 0 -               |

**Table S2b.** Microbial transformation of quercetin, HPLC conversion expressed by means and standard deviation (continuation).

| Strain                                 | Time of<br>biotransformation<br>[days] | Conversion [%] after 1, 3, 7 and 10 days of biotransformation |          |     |           |                   |
|----------------------------------------|----------------------------------------|---------------------------------------------------------------|----------|-----|-----------|-------------------|
|                                        |                                        | Substrate<br>(1)                                              | Products |     |           | Other<br>products |
|                                        |                                        |                                                               | 2        | 3   | 4         |                   |
| <i>Metapochonia bulbillosa</i> CYP17   | 1                                      | 98.9 ± 0.5                                                    | 0 -      | 0 - | 0 -       | 1.1 ± 0.5         |
|                                        | 3                                      | 98.5 ± 0.4                                                    | 0 -      | 0 - | 0 -       | 1.8 ± 0.7         |
|                                        | 7                                      | 97.0 ± 0.2                                                    | 0 -      | 0 - | 0 -       | 3.0 ± 0.2         |
|                                        | 10                                     | 96.0 ± 0.6                                                    | 0 -      | 0 - | 0 -       | 4.0 ± 0.6         |
| <i>Beauveria felina</i> ENC3           | 1                                      | >99 -                                                         | 0 -      | 0 - | 0 -       | <1 -              |
|                                        | 3                                      | >99 -                                                         | 0 -      | 0 - | 0 -       | <1 -              |
|                                        | 7                                      | >99 -                                                         | 0 -      | 0 - | 0 -       | <1 -              |
|                                        | 10                                     | >99 -                                                         | 0 -      | 0 - | 0 -       | <1 -              |
| <i>Lecanicillium lecanii</i> DSM 63098 | 1                                      | >99 -                                                         | 0 -      | 0 - | 0 -       | <1 -              |
|                                        | 3                                      | >99 -                                                         | 0 -      | 0 - | 0 -       | <1 -              |
|                                        | 7                                      | >99 -                                                         | 0 -      | 0 - | 0 -       | <1 -              |
|                                        | 10                                     | >99 -                                                         | 0 -      | 0 - | 0 -       | <1 -              |
| <i>Lecanicillium lecanii</i> NK3       | 1                                      | >99 -                                                         | 0 -      | 0 - | 0 -       | <1 -              |
|                                        | 3                                      | >99 -                                                         | 0 -      | 0 - | 0 -       | <1 -              |
|                                        | 7                                      | >99 -                                                         | 0 -      | 0 - | 0 -       | <1 -              |
|                                        | 10                                     | >99 -                                                         | 0 -      | 0 - | 0 -       | <1 -              |
| <i>Metarhizium anisopliae</i> MU4      | 1                                      | 96.6 ± 1.4                                                    | 0 -      | 0 - | 0 -       | 3.4 ± 1.4         |
|                                        | 3                                      | 86.8 ± 6.3                                                    | 0 -      | 0 - | 0.1 ± 0.1 | 15.4 ± 6.8        |
|                                        | 7                                      | 48.9 ± 8.2                                                    | 0 -      | 0 - | 0.6 ± 0.2 | 50.5 ± 8.2        |
|                                        | 10                                     | 10.1 ± 2.4                                                    | 0 -      | 0 - | 4.2 ± 0.8 | 85.7 ± 2.5        |



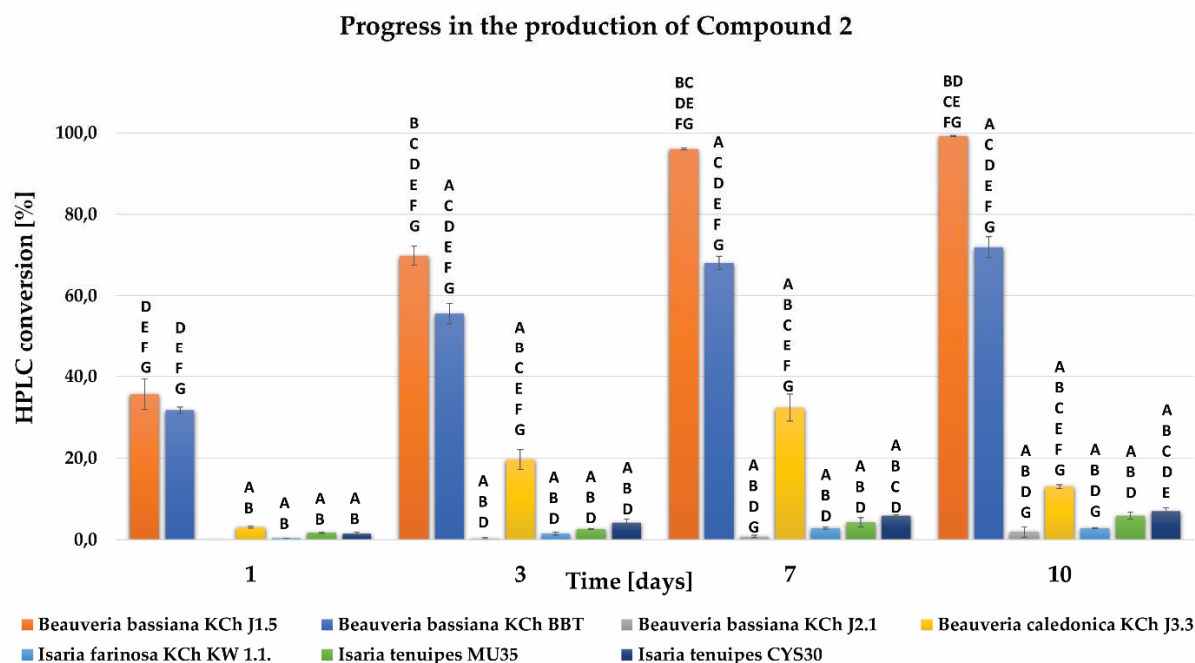

**Figure S24.** Progress in production of compound 2 by entomopathogenic fungi.

Statistically significant at  $p$  value  $< 0.05$ : A – vs obtaining of compound 2 by *Beauveria bassiana* KCh J1.5; B – vs obtaining of compound 2 by *Beauveria bassiana* KCh BBT; C – vs obtaining of compound 2 by *Beauveria bassiana* KCh J2.1; D – vs obtaining of compound 2 by *Beauveria caledonica* KCh J3.3; E – vs obtaining of compound 2 by *Isaria farinosa* KCh KW 1.1; F – vs obtaining of compound 2 by *Isaria tenuipes* MU35; G – vs obtaining of compound 2 by *Isaria tenuipes* CYS30

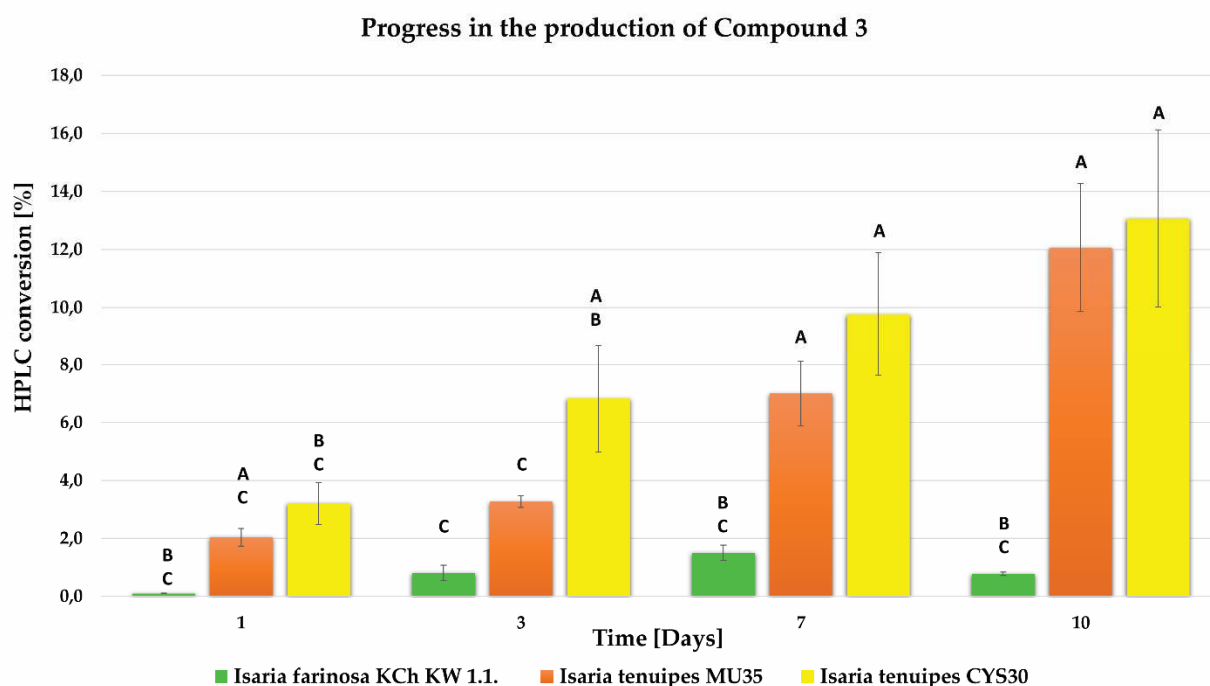

**Figure S25.** Progress in production of compound 3 by entomopathogenic fungi.

Statistically significant at  $p$  value  $< 0.05$ : A – vs obtaining of compound 3 by *Isaria farinosa* KCh KW 1.1; B – vs obtaining of compound 3 by *Isaria tenuipes* MU35; C – vs obtaining of compound 3 by *Isaria tenuipes* CYS30

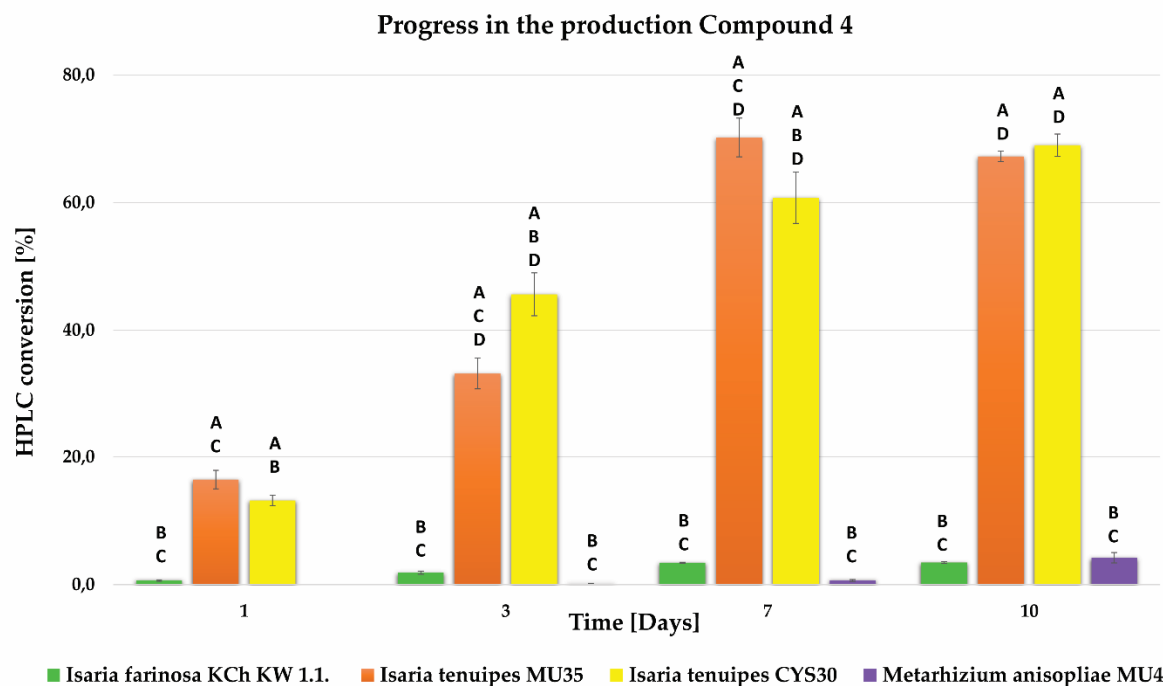

**Figure S26.** Progress in production of compound 4 by entomopathogenic fungi.

Statistically significant at  $p$  value  $< 0.05$ : **A** – vs obtaining of compound 4 by *Isaria farinosa* KCh KW 1.1; **B** – vs obtaining of compound 4 by *Isaria tenuipes* MU35; **C** – vs obtaining of compound 4 by *Isaria tenuipes* CYS30; **D** – vs obtaining of compound 4 by *Metarhizium anisopliae* MU4
